# Supplementary material for: β-Methoxyphenyl substituted porphyrins: synthesis, characterization and comprehensive spectral, structural, electrochemical and theoretical analysis
Source: Royal Society of Chemistry journal article supplement (doi:10.1039/d4nj03904a), 2024-01-01

## Electronic Supplementary Information

### $\beta$ -Methoxyphenyl Substituted Porphyrins: Synthesis, Characterization and Comprehensive Spectral, Structural, Electrochemical and Theoretical Analysis

Waseem Arif<sup>a</sup>, Vipin Kumar<sup>b</sup>, Prabhakar Chetti<sup>b</sup> and Ravi Kumar<sup>\*a</sup>

<sup>a</sup>Department of Chemistry, National Institute of Technology Srinagar, 190006, Jammu and Kashmir, India

<sup>b</sup>Department of Chemistry, National Institute of Technology Kurushetra, 136119, Kurukshetra, Haryana, India

#### Table of Contents (TOC)

- Figure S1.** UV- Visible spectra of CuTPP(R)<sub>2</sub> ; where R = *p*-CH<sub>3</sub>O-Ph, *m*-CH<sub>3</sub>O-Ph & *m,p*-CH<sub>3</sub>O-Ph in CH<sub>2</sub>Cl<sub>2</sub>.
- Figure S2.** UV- Visible spectra of CoTPP(R)<sub>2</sub> ; where R = *p*-CH<sub>3</sub>O-Ph, *m*-CH<sub>3</sub>O-Ph & *m,p*-CH<sub>3</sub>O-Ph in CH<sub>2</sub>Cl<sub>2</sub>.
- Figure S3.** UV- Visible spectra of NiTPP(R)<sub>2</sub> ; where R = *p*-CH<sub>3</sub>O-Ph, *m*-CH<sub>3</sub>O-Ph & *m,p*-CH<sub>3</sub>O-Ph in CH<sub>2</sub>Cl<sub>2</sub>.
- Figure S4.** UV- Visible spectra of ZnTPP(R)<sub>2</sub> ; where R = *p*-CH<sub>3</sub>O-Ph, *m*-CH<sub>3</sub>O-Ph & *m,p*-CH<sub>3</sub>O-Ph in CH<sub>2</sub>Cl<sub>2</sub>.
- Figure S5.** Fluorescence spectra of ZnTPP(R)<sub>2</sub> ; where R = *p*-CH<sub>3</sub>O-Ph, *m*-CH<sub>3</sub>O-Ph & *m,p*-CH<sub>3</sub>O-Ph in CH<sub>2</sub>Cl<sub>2</sub> at 298 K.
- Figure S6.** Cyclic voltammograms of NiTPP(R)<sub>2</sub> ; where R = *p*-CH<sub>3</sub>O-Ph, *m*-CH<sub>3</sub>O-Ph & *m,p*-CH<sub>3</sub>O-Ph (~1 mM) in CH<sub>2</sub>Cl<sub>2</sub> containing 0.1 M TBAPF<sub>6</sub> using Ag/AgCl as reference electrode with a scan rate of 0.10 V/s at 298 K.
- Figure S7.** Cyclic voltammograms of CuTPP(R)<sub>2</sub> ; where R = *p*-CH<sub>3</sub>O-Ph, *m*-CH<sub>3</sub>O-Ph & *m,p*-CH<sub>3</sub>O-Ph (~1 mM) in CH<sub>2</sub>Cl<sub>2</sub> containing 0.1 M TBAPF<sub>6</sub> using Ag/AgCl as reference electrode with a scan rate of 0.10 V/s at 298 K.
- Figure S8.** Cyclic voltammograms of CoTPP(R)<sub>2</sub> ; where R = *p*-CH<sub>3</sub>O-Ph, *m*-CH<sub>3</sub>O-Ph & *m,p*-CH<sub>3</sub>O-Ph (~1 mM) in CH<sub>2</sub>Cl<sub>2</sub> containing 0.1 M TBAPF<sub>6</sub> using Ag/AgCl as reference electrode with a scan rate of 0.10 V/s at 298 K.
- Figure S9.** (a) Represent the dn<sub>orm</sub> plot, (b) represent the di plot, (c) represent the de plot, (d) represent the shape index (e) represent the curvedness plot and (f) represent the fragment patches with selected network of interaction of ZnTPP(*m*-CH<sub>3</sub>O-Ph)<sub>2</sub>.

**Figure S10.** 2D-fingerprint plots showing relative contribution of different types of interactions between atoms in crystal packing of ZnTPP(*m*-CH<sub>3</sub>O-Ph)<sub>2</sub>. The di and de values are the closest internal and external distances (in Å) from given points on the Hirshfeld surface of ZnTPP(*m*-CH<sub>3</sub>O-Ph)<sub>2</sub>.

**Figure S11.** (a) Represent the d<sub>norm</sub> plot, (b) represent the di plot, (c) represent the de plot, (d) represent the shape index (e) represent the curvedness plot and (f) represent the fragment patches with selected network of interaction of CuTPP(*m*-CH<sub>3</sub>O-Ph)<sub>2</sub>.

**Figure S12.** 2D-fingerprint plots showing relative contribution of different types of interactions between atoms in crystal packing of CuTPP(*m*-CH<sub>3</sub>O-Ph)<sub>2</sub>. The di and de values are the closest internal and external distances (in Å) from given points on the Hirshfeld surface of CuTPP(*m*-CH<sub>3</sub>O-Ph)<sub>2</sub>.

**Figure S13.** Figure S13. Optimized structures of synthesized molecules MTPP(*p*-CH<sub>3</sub>O-Ph)<sub>2</sub>, M = 2H, Zn (a, b), MTPP(*m*-CH<sub>3</sub>O-Ph)<sub>2</sub>, M = 2H, Zn (c, d) & MTPP(*m,p*-CH<sub>3</sub>O-Ph)<sub>2</sub>, M = 2H, Zn (e, f) respectively, by using B3LYP-6-31G (d, p) level of theory in combination with LANL2DZ basis set.

**Figure S14.** B3LYP/LanL2DZ optimized geometries showing top as well as side views of ZnTPP(*p*-CH<sub>3</sub>O-Ph)<sub>2</sub> (a & b), ZnTPP(*m*-CH<sub>3</sub>O-Ph)<sub>2</sub> (c & d) and ZnTPP(*m,p*-CH<sub>3</sub>O-Ph)<sub>2</sub> (e & f).

**Figure S15.** B3LYP/6-31G optimized geometries showing direction of dipole moment of MTPP(*p*-CH<sub>3</sub>O-Ph)<sub>2</sub>, M = 2H, Zn (a, b), MTPP(*m*-CH<sub>3</sub>O-Ph)<sub>2</sub>, M = 2H, Zn (c, d) & MTPP(*m,p*-CH<sub>3</sub>O-Ph)<sub>2</sub>, M = 2H, Zn (e, f) respectively. by using B3LYP-6-31G (d, p) level of theory in combination with LANL2DZ basis set. Color codes for atoms: C (black), N (blue), H (white) and O (red) and Zn (light blue).

**Figure S16.** B3LYP/6-31G optimised geometries showing Frontier Molecular Orbitals (FMOs) of H<sub>2</sub>TPP(*p*-CH<sub>3</sub>O-Ph)<sub>2</sub> (having isosurface contour value of 0.03).

**Figure S17.** B3LYP/6-31G optimised geometries showing Frontier Molecular Orbitals (FMOs) of ZnTPP(*p*-CH<sub>3</sub>O-Ph)<sub>2</sub> (having isosurface contour value of 0.03).

**Figure S18.** B3LYP/6-31G optimised geometries showing Frontier Molecular Orbitals (FMOs) of H<sub>2</sub>TPP(*m*-CH<sub>3</sub>O-Ph)<sub>2</sub> (having isosurface contour value of 0.03).

**Figure S19.** B3LYP/6-31G optimised geometries showing Frontier Molecular Orbitals (FMOs) of ZnTPP(*m*-CH<sub>3</sub>O-Ph)<sub>2</sub> (having isosurface contour value of 0.03).

**Figure S20.** B3LYP/6-31G optimised geometries showing Frontier Molecular Orbitals (FMOs) of H<sub>2</sub>TPP(*m,p*-CH<sub>3</sub>O-Ph)<sub>2</sub> (having isosurface contour value of 0.03).

**Figure S21.** B3LYP/6-31G optimised geometries showing Frontier Molecular Orbitals (FMOs) of ZnTPP(*m,p*-CH<sub>3</sub>O-Ph)<sub>2</sub> (having isosurface contour value of 0.03).

**Figure S22.** Molecular electrostatic potential (MEP) Zinc porphyrins:(a) ZnTPP(*p*-CH<sub>3</sub>O-Ph)<sub>2</sub> (b) ZnTPP(*m*-CH<sub>3</sub>O-Ph)<sub>2</sub> and (c) ZnTPP(*m,p*-CH<sub>3</sub>O-Ph)<sub>2</sub> using the B3LYP/ 6 31G (d, p) technique in the Gaussian 16W, in gas phase.

**Figure S23.** <sup>1</sup>H NMR spectrum of H<sub>2</sub>TPP(*p*-CH<sub>3</sub>O-Ph)<sub>2</sub> in CDCl<sub>3</sub> at 298 K.

**Figure S24.** <sup>1</sup>H NMR spectrum of ZnTPP(*p*-CH<sub>3</sub>O-Ph)<sub>2</sub> in CDCl<sub>3</sub> at 298 K.

**Figure S25.** <sup>1</sup>H NMR spectrum of NiTPP(*p*-CH<sub>3</sub>O-Ph)<sub>2</sub> in CDCl<sub>3</sub> at 298 K.

**Figure S26.** <sup>1</sup>H NMR spectrum of H<sub>2</sub>TPP(*m*-CH<sub>3</sub>O-Ph)<sub>2</sub> in CDCl<sub>3</sub> at 298 K.

**Figure S27.** <sup>1</sup>H NMR spectrum of ZnTPP(*m*-CH<sub>3</sub>O-Ph)<sub>2</sub> in CDCl<sub>3</sub> at 298 K.

**Figure S28.** <sup>1</sup>H NMR spectrum of NiTPP(*m*-CH<sub>3</sub>O-Ph)<sub>2</sub> in CDCl<sub>3</sub> at 298 K.

**Figure S29.** <sup>1</sup>H NMR spectrum of H<sub>2</sub>TPP(*m,p*-CH<sub>3</sub>O-Ph)<sub>2</sub> in CDCl<sub>3</sub> at 298 K.

**Figure S30.** <sup>1</sup>H NMR spectrum of ZnTPP(*m,p*-CH<sub>3</sub>O-Ph)<sub>2</sub> in CDCl<sub>3</sub> at 298 K.

**Figure S31.** <sup>1</sup>H NMR spectrum of NiTPP(*m,p*-CH<sub>3</sub>O-Ph)<sub>2</sub> in CDCl<sub>3</sub> at 298 K.

**Figure S32.** <sup>13</sup>C NMR spectrum of H<sub>2</sub>TPP(*p*-CH<sub>3</sub>O-Ph)<sub>2</sub> in CDCl<sub>3</sub> at 298 K.

**Figure S33.** <sup>13</sup>C NMR spectrum of H<sub>2</sub>TPP(*m*-CH<sub>3</sub>O-Ph)<sub>2</sub> in CDCl<sub>3</sub> at 298 K.

**Figure S34.** <sup>13</sup>C NMR spectrum of H<sub>2</sub>TPP(*m,p*-CH<sub>3</sub>O-Ph)<sub>2</sub> in CDCl<sub>3</sub> at 298 K.

**Figure S35.** X-band EPR Spectra of (a) CoTPP(R)<sub>2</sub>; where R = *p*-CH<sub>3</sub>O-Ph, *m*-CH<sub>3</sub>O-Ph & *m,p*-CH<sub>3</sub>O-Ph (b) CuTPP(R)<sub>2</sub>; where R = *p*-CH<sub>3</sub>O-Ph, *m*-CH<sub>3</sub>O-Ph & *m,p*-CH<sub>3</sub>O-Ph in toluene at 100 K.

**Figure S36.** HRMS spectrum of H<sub>2</sub>TPP(*p*-CH<sub>3</sub>O-Ph)<sub>2</sub>.

**Figure S37.** HRMS spectrum of ZnTPP(*p*-CH<sub>3</sub>O-Ph)<sub>2</sub>.

**Figure S38.** HRMS spectrum of NiTPP(*p*-CH<sub>3</sub>O-Ph)<sub>2</sub>.

**Figure S39.** HRMS spectrum of CuTPP(*p*-CH<sub>3</sub>O-Ph)<sub>2</sub>.

**Figure S40.** HRMS spectrum of CoTPP(*p*-CH<sub>3</sub>O-Ph)<sub>2</sub>.

**Figure S41.** HRMS spectrum of H<sub>2</sub>TPP(*m*-CH<sub>3</sub>O-Ph)<sub>2</sub>.

**Figure S42.** HRMS spectrum of ZnTPP(*m*-CH<sub>3</sub>O-Ph)<sub>2</sub>.

**Figure S43.** HRMS spectrum of NiTPP(*m*-CH<sub>3</sub>O-Ph)<sub>2</sub>.

**Figure S44.** HRMS spectrum of CuTPP(*m*-CH<sub>3</sub>O-Ph)<sub>2</sub>.

**Figure S45.** HRMS spectrum of CoTPP(*m*-CH<sub>3</sub>O-Ph)<sub>2</sub>.

**Figure S46.** HRMS spectrum of H<sub>2</sub>TPP(*m,p*-CH<sub>3</sub>O-Ph)<sub>2</sub>.

**Figure S47.** HRMS spectrum of ZnTPP(*m,p*-CH<sub>3</sub>O-Ph)<sub>2</sub>.

**Figure S48.** HRMS spectrum of NiTPP(*m,p*-CH<sub>3</sub>O-Ph)<sub>2</sub>.

**Figure S49.** HRMS spectrum of CoTPP(*m,p*-CH<sub>3</sub>O-Ph)<sub>2</sub>.

**Figure S50.** HRMS spectrum of CuTPP(*m,p*-CH<sub>3</sub>O-Ph)<sub>2</sub>.

**Table S1.** Optical absorption spectral data of all the newly synthesized  $\beta$ -di-substituted free base porphyrins as well as their metal complexes functionalized with mono-, di- & tri-substituted methoxyphenyl groups. The values in parentheses refer to log  $\epsilon$  ( $\epsilon$  in dm<sup>3</sup> mol<sup>-1</sup> cm<sup>-1</sup>).

**Table S2.** Fluorescence spectral data of ZnTPP(R)<sub>2</sub> ; where R = *p*-CH<sub>3</sub>O-Ph, *m*-CH<sub>3</sub>O-Ph & *m,p*-CH<sub>3</sub>O-Ph derivatives in CH<sub>2</sub>Cl<sub>2</sub> at 298 K, ( $\Phi_f$  = quantum yield relative to those of ZnTPP in DCM).

**Table S3.** Electrochemical redox data of newly synthesized free base  $\beta$ -di-substituted porphyrins functionalized with mono-, di- & tri-substituted methoxyphenyl groups and their metal complexes MTPP(R)<sub>2</sub> ; where M = H<sub>2</sub>, Cu(II), Ni(II) & Zn(II) and R = *p*-CH<sub>3</sub>O-Ph, *m*-CH<sub>3</sub>O-Ph & *m,p*-CH<sub>3</sub>O-Ph (in CH<sub>2</sub>Cl<sub>2</sub> containing 0.1 M TBAPF<sub>6</sub> with a scan rate of 0.1 V/s at 298 K).

**Table S4.** Crystal structure data of H<sub>2</sub>TPP(*p*-CH<sub>3</sub>O-Ph)<sub>2</sub>, ZnTPP(*m*-CH<sub>3</sub>O-Ph)<sub>2</sub> & CuTPP(*m*-CH<sub>3</sub>O-Ph)<sub>2</sub>.

**Table S5.** Selected bond lengths (Å) and bond angles (°) of H<sub>2</sub>TPP(*p*-CH<sub>3</sub>O-Ph)<sub>2</sub>, ZnTPP(*m*-CH<sub>3</sub>O-Ph)<sub>2</sub> & CuTPP(*m*-CH<sub>3</sub>O-Ph)<sub>2</sub>.

**Table S6.** Selected bond lengths (Å) and bond angles (°) for the B3LYP/6-31G optimized geometries of H<sub>2</sub>TPP(*p*-CH<sub>3</sub>O-Ph)<sub>2</sub>, H<sub>2</sub>TPP(*m*-CH<sub>3</sub>O-Ph)<sub>2</sub> & H<sub>2</sub>TPP(*m,p*-CH<sub>3</sub>O-Ph)<sub>2</sub>.

**Table S7.** Selected bond lengths (Å) and bond angles (°) for the B3LYP/6-31G optimized geometries of ZnTPP(*p*-CH<sub>3</sub>O-Ph)<sub>2</sub>, ZnTPP(*m*-CH<sub>3</sub>O-Ph)<sub>2</sub> & ZnTPP(*m,p*-CH<sub>3</sub>O-Ph)<sub>2</sub>.

**Table S8.** The calculated Absorption, Oscillator strength, Molecular Transitions (M.T.), % weight contribution (% Ci > 10) of synthesized [ZnTPP(R)<sub>2</sub> R = *p*-CH<sub>3</sub>O-Ph, *m*-CH<sub>3</sub>O-Ph & *m,p*-CH<sub>3</sub>O-Ph] at B3LYP-6-31G (d, p) level of theory in combination with LANL2DZ basis set.

**Table S1.** Optical absorption spectral data of all the newly synthesized  $\beta$ -di-substituted free base porphyrins as well as their metal complexes functionalized with mono-, di- & tri-substituted methoxyphenyl groups. The values in parentheses refer to  $\log \epsilon$  ( $\epsilon$  in  $\text{dm}^3 \text{mol}^{-1} \text{cm}^{-1}$ ).

| <b>Porphyrins</b>                                    | <b>Soret band, (nm)</b> | <b>Q band(s), (nm)</b>                         |
|------------------------------------------------------|-------------------------|------------------------------------------------|
| $\text{H}_2\text{TPP}(\text{p-OCH}_3\text{-Ph})_2$   | 425 (5.58)              | 522 (4.34), 554 (4.02), 594 (3.61), 650 (3.47) |
| $\text{CuTPP}(\text{p-OCH}_3\text{-Ph})_2$           | 418 (5.58)              | 537 (4.13)                                     |
| $\text{CoTPP}(\text{p-OCH}_3\text{-Ph})_2$           | 421 (5.63)              | 545 (4.39)                                     |
| $\text{NiTPP}(\text{p-OCH}_3\text{-Ph})_2$           | 424 (5.63)              | 539 (4.48)                                     |
| $\text{ZnTPP}(\text{p-OCH}_3\text{-Ph})_2$           | 425 (5.62)              | 553 (4.35), 589 (3.71)                         |
| $\text{H}_2\text{TPP}(\text{m-OCH}_3\text{-Ph})_2$   | 423 (5.57)              | 521 (4.32), 557 (4.21) 592 (4.00), 653 (3.47)  |
| $\text{CuTPP}(\text{m-OCH}_3\text{-Ph})_2$           | 421 (5.66)              | 544 (4.25)                                     |
| $\text{CoTPP}(\text{m-OCH}_3\text{-Ph})_2$           | 417 (5.62)              | 536 (4.57)                                     |
| $\text{NiTPP}(\text{m-OCH}_3\text{-Ph})_2$           | 420 (5.63)              | 535 (4.49)                                     |
| $\text{ZnTPP}(\text{m-OCH}_3\text{-Ph})_2$           | 423 (5.60)              | 552 (4.31), 594 (3.70)                         |
| $\text{H}_2\text{TPP}(\text{m,p-OCH}_3\text{-Ph})_2$ | 421 (5.62)              | 518 (4.39), 553 (4.19), 593 (3.90), 648 (3.64) |
| $\text{CuTPP}(\text{m,p-OCH}_3\text{-Ph})_2$         | 417 (5.64)              | 542 (4.38)                                     |
| $\text{CoTPP}(\text{m,p-OCH}_3\text{-Ph})_2$         | 414 (5.59)              | 532 (4.53)                                     |
| $\text{NiTPP}(\text{m,p-OCH}_3\text{-Ph})_2$         | 423 (5.61)              | 538 (4.46)                                     |
| $\text{ZnTPP}(\text{m,p-OCH}_3\text{-Ph})_2$         | 422 (5.65)              | 551 (4.37), 592 (3.67)                         |

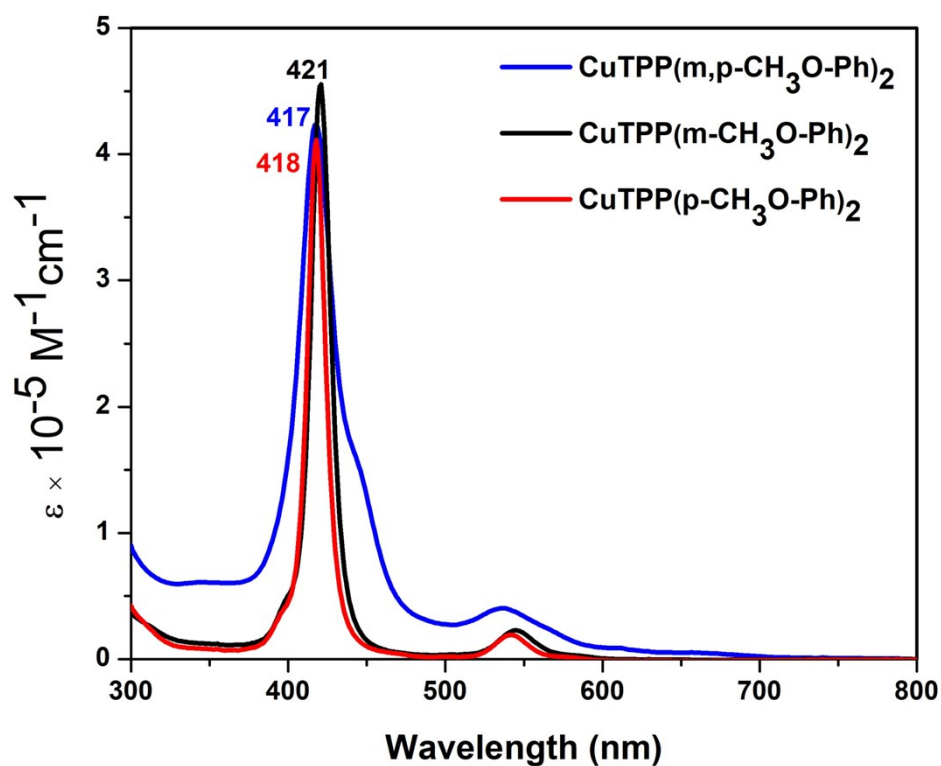

**Figure S1.** UV- Visible spectra of  $\text{CuTPP}(\text{R})_2$  ; where  $\text{R} = p\text{-CH}_3\text{O-Ph}$ ,  $m\text{-CH}_3\text{O-Ph}$  &  $m,p\text{-CH}_3\text{O-Ph}$  in  $\text{CH}_2\text{Cl}_2$ .

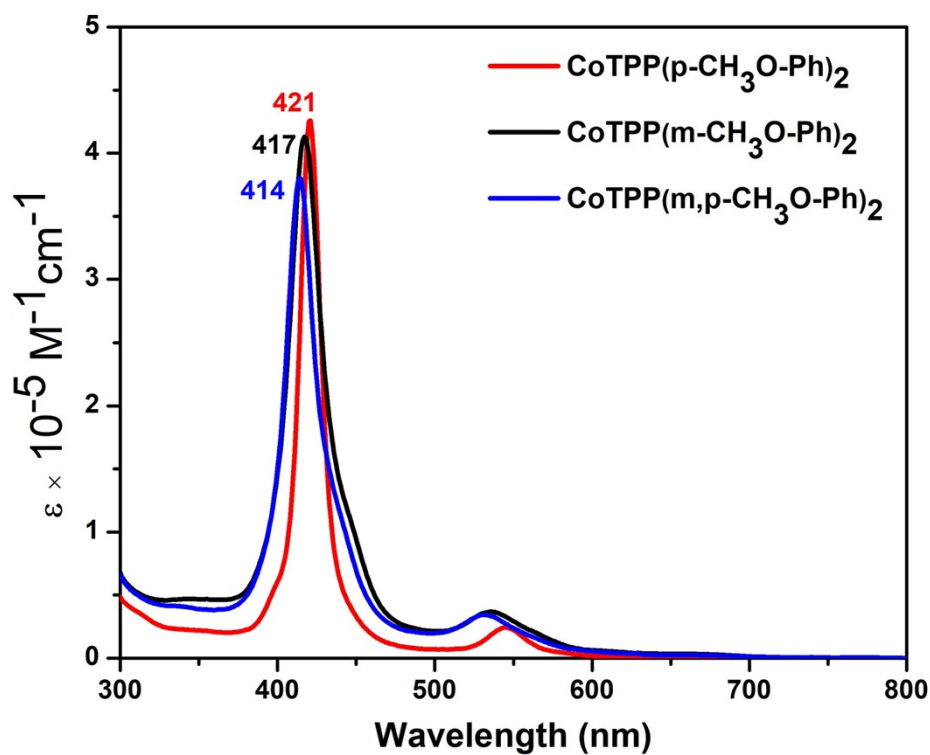

**Figure S2.** UV- Visible spectra of  $\text{CoTPP}(\text{R})_2$  ; where  $\text{R} = p\text{-CH}_3\text{O-Ph}$ ,  $m\text{-CH}_3\text{O-Ph}$  &  $m,p\text{-CH}_3\text{O-Ph}$  in  $\text{CH}_2\text{Cl}_2$ .

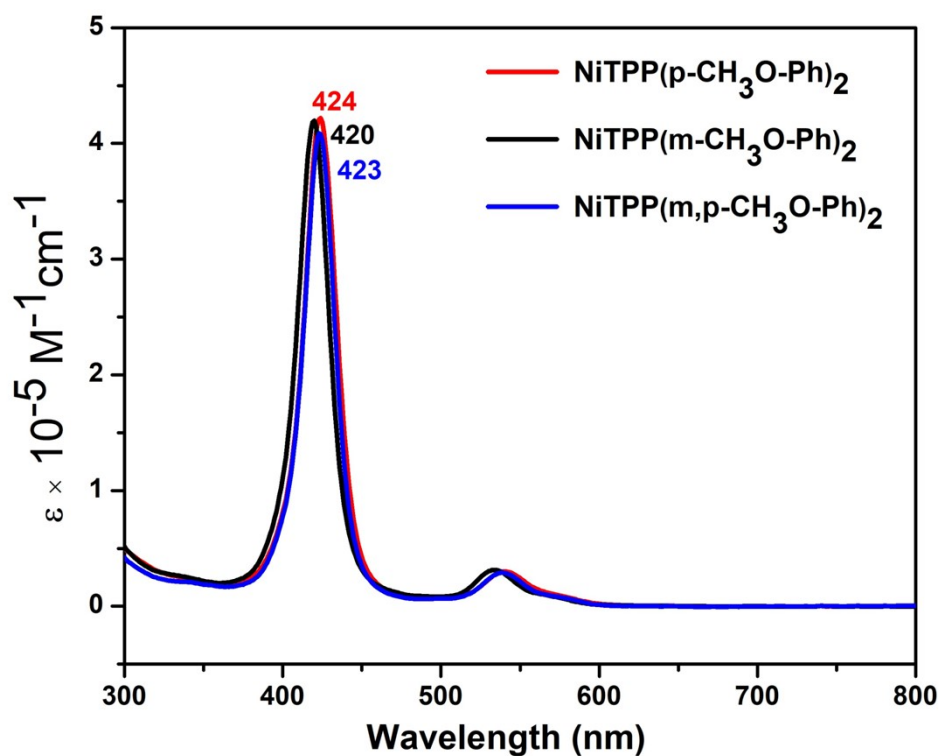

**Figure S3.** UV- Visible spectra of CoTPP(R)<sub>2</sub> ; where R = *p*-CH<sub>3</sub>O-Ph, *m*-CH<sub>3</sub>O-Ph & *m,p*-CH<sub>3</sub>O-Ph in CH<sub>2</sub>Cl<sub>2</sub>.

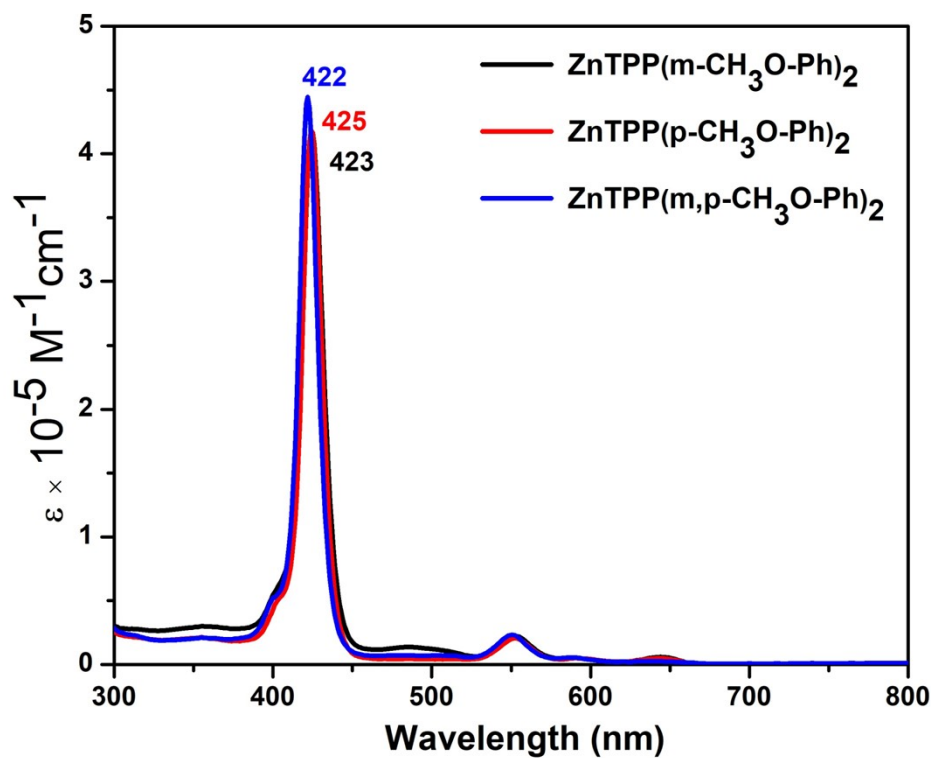

**Figure S4.** UV- Visible spectra of CoTPP(R)<sub>2</sub> ; where R = *p*-CH<sub>3</sub>O-Ph, *m*-CH<sub>3</sub>O-Ph & *m,p*-CH<sub>3</sub>O-Ph in CH<sub>2</sub>Cl<sub>2</sub>.

**Table S2.** Fluorescence spectral data of ZnTPP(R)<sub>2</sub> ; where R = *p*-CH<sub>3</sub>O-Ph, *m*-CH<sub>3</sub>O-Ph & *m,p*-CH<sub>3</sub>O-Ph derivatives in CH<sub>2</sub>Cl<sub>2</sub> at 298 K, ( $\Phi_f$  = quantum yield relative to those of ZnTPP in DCM).

| Porphyrins                                            | $\lambda$ excitation, nm | $\lambda$ emission, nm | $\Phi_f$ |
|-------------------------------------------------------|--------------------------|------------------------|----------|
| ZnTPP( <i>p</i> -OCH <sub>3</sub> -Ph) <sub>2</sub>   | 424                      | 657                    | 0.0088   |
| ZnTPP( <i>m</i> -OCH <sub>3</sub> -Ph) <sub>2</sub>   | 423                      | 656                    | 0.0097   |
| ZnTPP( <i>m,p</i> -OCH <sub>3</sub> -Ph) <sub>2</sub> | 422                      | 654                    | 0.0095   |

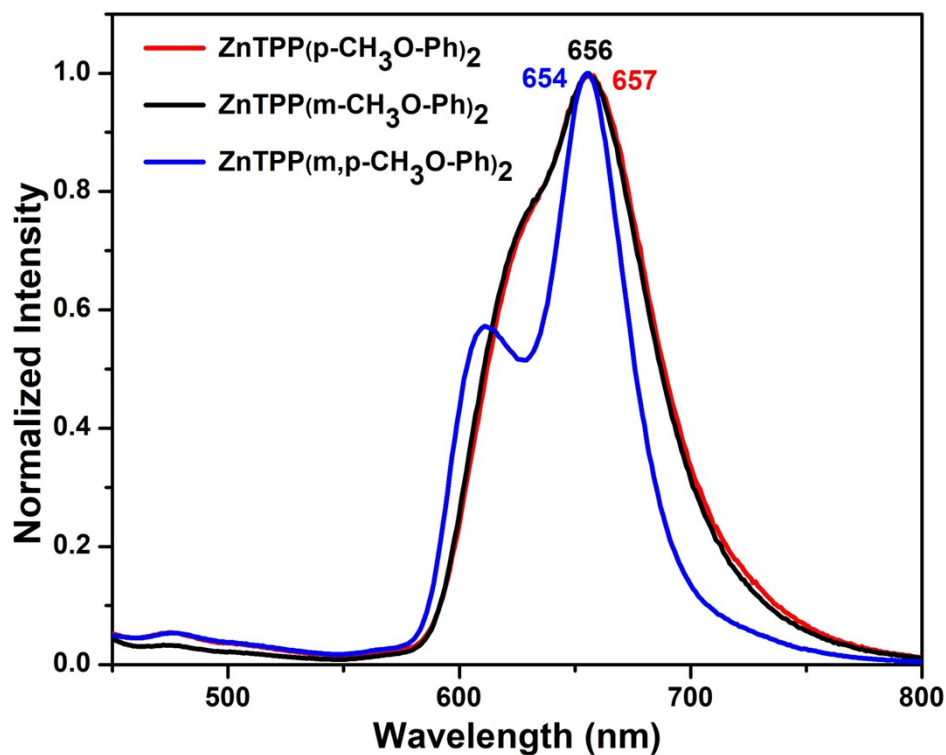

**Figure S5.** Fluorescence spectra of ZnTPP(R)<sub>2</sub> ; where R = *p*-CH<sub>3</sub>O-Ph, *m*-CH<sub>3</sub>O-Ph & *m,p*-CH<sub>3</sub>O-Ph in CH<sub>2</sub>Cl<sub>2</sub> at 298 K.



**Table S3.** Electrochemical redox data of newly synthesized free base  $\beta$ -tri-substituted porphyrins functionalized with mono-, di- & tri-substituted methoxyphenyl groups and their metal complexes MTPP(R)<sub>2</sub>; where M = H<sub>2</sub>, Cu(II), Ni(II) & Zn(II) and R = *p*-CH<sub>3</sub>O-Ph, *m*-CH<sub>3</sub>O-Ph & *m,p*-CH<sub>3</sub>O-Ph (in CH<sub>2</sub>Cl<sub>2</sub> containing 0.1 M TBAPF<sub>6</sub> with a scan rate of 0.1 V/s at 298 K).

| Porphyrins                                                         | Oxidation (V) |                   |         | Reduction (V) |                    |                    | $\Delta E$ (V) |
|--------------------------------------------------------------------|---------------|-------------------|---------|---------------|--------------------|--------------------|----------------|
|                                                                    | I-Oxd         | II-Oxd            | III-Oxd | I-Red         | II-Red             | III-Red            |                |
| H <sub>2</sub> TPP( <i>p</i> -OCH <sub>3</sub> -Ph) <sub>2</sub>   | 0.90          | 1.08              |         | -1.19         | -1.65 <sup>a</sup> |                    | 2.08           |
| CuTPP( <i>p</i> -OCH <sub>3</sub> -Ph) <sub>2</sub>                | 0.86          | 1.25              |         | -1.31         | -1.67 <sup>a</sup> |                    | 2.17           |
| CoTPP( <i>p</i> -OCH <sub>3</sub> -Ph) <sub>2</sub>                | 0.65          | 1.06              | 1.23    | -0.73a        | -1.31              | -1.39 <sup>a</sup> | 2.37           |
| NiTPP( <i>p</i> -OCH <sub>3</sub> -Ph) <sub>2</sub>                | 0.95          | 1.23              |         | -1.27         | -1.87 <sup>a</sup> |                    | 2.22           |
| ZnTPP( <i>p</i> -OCH <sub>3</sub> -Ph) <sub>2</sub>                | 0.76          | 0.98              |         | -1.37         | -1.62 <sup>a</sup> |                    | 2.13           |
| H <sub>2</sub> TPP( <i>m</i> -OCH <sub>3</sub> -Ph) <sub>2</sub>   | 0.94          | 1.09 <sup>a</sup> |         | -1.19         | -1.41              |                    | 2.13           |
| CuTPP( <i>m</i> -OCH <sub>3</sub> -Ph) <sub>2</sub>                | 0.88          | 1.32              | 1.51    | -1.29         | -1.67 <sup>a</sup> |                    | 2.17           |
| CoTPP( <i>m</i> -OCH <sub>3</sub> -Ph) <sub>2</sub>                | 0.71          | 1.09              | 1.37    | -0.84         | -1.15              | -1.38              | 2.24           |
| NiTPP( <i>m</i> -OCH <sub>3</sub> -Ph) <sub>2</sub>                | 1.03          | 1.29              | 1.46    | -1.11         | -1.31              | -1.71              | 2.14           |
| ZnTPP( <i>m</i> -OCH <sub>3</sub> -Ph) <sub>2</sub>                | 0.80          | 1.03              |         | -1.36         | -1.58 <sup>a</sup> |                    | 2.17           |
| H <sub>2</sub> TPP( <i>m,p</i> -OCH <sub>3</sub> -Ph) <sub>2</sub> | 1.01          | 1.24              | 1.47    | -1.22         | -1.52 <sup>a</sup> |                    | 2.22           |
| CuTPP( <i>m,p</i> -OCH <sub>3</sub> -Ph) <sub>2</sub>              | 0.95          | 1.31              | 1.46    | -1.12         | -1.35              |                    | 2.01           |
| CoTPP( <i>m,p</i> -OCH <sub>3</sub> -Ph) <sub>2</sub>              | 0.82          | 1.08              | 1.27    | -0.84         | -1.16              | -1.41              | 2.24           |
| NiTPP( <i>m,p</i> -OCH <sub>3</sub> -Ph) <sub>2</sub>              | 0.99          | 1.27              | 1.46    | -1.32         | -1.76              | -1.95 <sup>a</sup> | 2.31           |
| ZnTPP( <i>m,p</i> -OCH <sub>3</sub> -Ph) <sub>2</sub>              | 0.83          | 1.09              | 1.45    | -1.35         | -1.57              |                    | 2.18           |

<sup>a</sup>refers to the values taken from DPV experiment

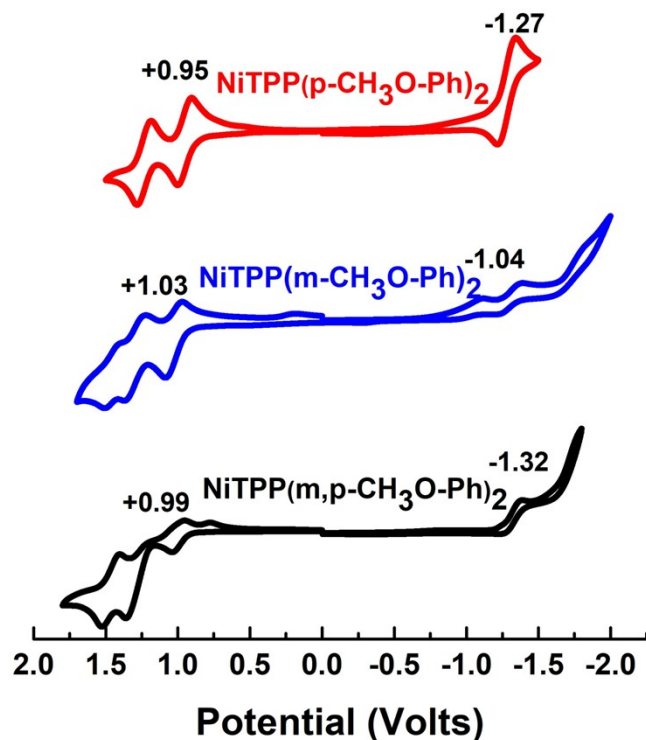

**Figure S6.** Cyclic voltammograms of NiTPP(R)<sub>2</sub> ; where R = *p*-CH<sub>3</sub>O-Ph, *m*-CH<sub>3</sub>O-Ph & *m,p*-CH<sub>3</sub>O-Ph (~1 mM) in CH<sub>2</sub>Cl<sub>2</sub> containing 0.1 M TBAPF<sub>6</sub> using Ag/AgCl as reference electrode with a scan rate of 0.10 V/s at 298 K.

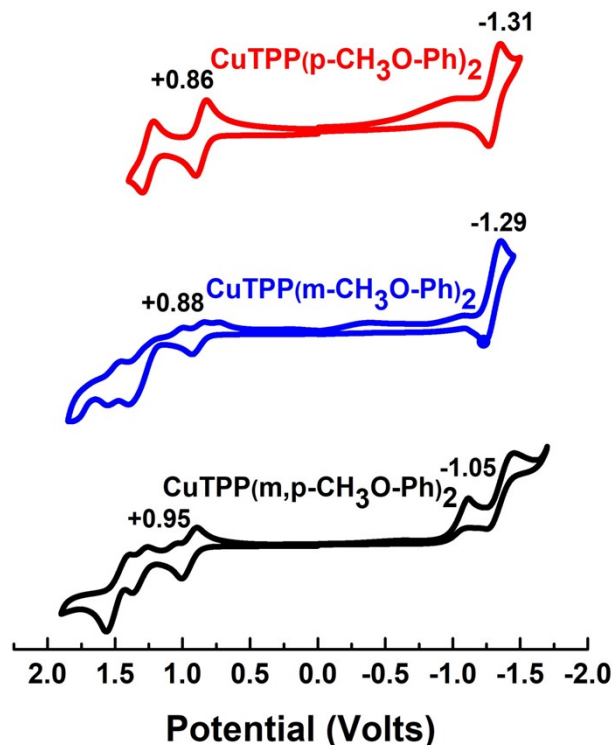

**Figure S7.** Cyclic voltammograms of CuTPP(R)<sub>2</sub> ; where R = *p*-CH<sub>3</sub>O-Ph, *m*-CH<sub>3</sub>O-Ph & *m,p*-CH<sub>3</sub>O-Ph (~1 mM) in CH<sub>2</sub>Cl<sub>2</sub> containing 0.1 M TBAPF<sub>6</sub> using Ag/AgCl as reference electrode with a scan rate of 0.10 V/s at 298 K.

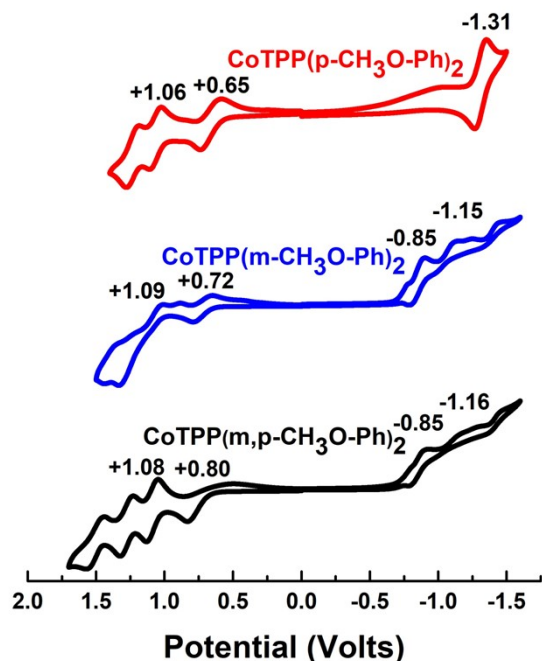

**Figure S8.** Cyclic voltammograms of CoTPP(R)<sub>2</sub> ; where R = *p*-CH<sub>3</sub>O-Ph, *m*-CH<sub>3</sub>O-Ph & *m,p*-CH<sub>3</sub>O-Ph (~1 mM) in CH<sub>2</sub>Cl<sub>2</sub> containing 0.1 M TBAPF<sub>6</sub> using Ag/AgCl as reference electrode with a scan rate of 0.10 V/s at 298 K.

|                                        | H <sub>2</sub> TPP( <i>p</i> -CH <sub>3</sub> O-Ph) <sub>2</sub> | ZnTPP( <i>m</i> -CH <sub>3</sub> O-Ph) <sub>2</sub>              | CuTPP( <i>m</i> -CH <sub>3</sub> O-Ph) <sub>2</sub>              |
|----------------------------------------|------------------------------------------------------------------|------------------------------------------------------------------|------------------------------------------------------------------|
| Empirical formula                      | C <sub>58</sub> H <sub>42</sub> N <sub>4</sub> O <sub>2</sub>    | C <sub>65</sub> H <sub>49</sub> N <sub>5</sub> O <sub>4</sub> Zn | C <sub>60</sub> H <sub>44</sub> N <sub>4</sub> O <sub>4</sub> Cu |
| Formula wt.                            | 826.95                                                           | 1029.46                                                          | 948.53                                                           |
| Crystal system                         | Monoclinic                                                       | Monoclinic                                                       | Triclinic                                                        |
| Space group                            | C2/c                                                             | P2 <sub>1</sub> /c                                               | P-1                                                              |
| <i>a</i> (Å)                           | 25.4032(11) Å                                                    | 9.9765(3) Å                                                      | 13.2014(7) Å                                                     |
| <i>b</i> (Å)                           | 10.7091(5) Å                                                     | 41.7796(16) Å                                                    | 13.3397(7) Å                                                     |
| <i>c</i> (Å)                           | 36.4314(15) Å                                                    | 13.3216(5) Å                                                     | 14.8686(7) Å                                                     |
| $\alpha$ (°)                           | 90°                                                              | 90°                                                              | 65.629(2)°                                                       |
| $\beta$ (°)                            | 109.790(2)°                                                      | 107.3030(10)                                                     | 76.969(2)°                                                       |
| $\gamma$ (°)                           | 90°                                                              | 90°                                                              | 89.430(2)°                                                       |
| Volume (Å <sup>3</sup> )               | 9325.6(7) Å <sup>3</sup>                                         | 5301.3(3) Å <sup>3</sup>                                         | 2313.5(2) Å <sup>3</sup>                                         |
| Z                                      | 8                                                                | 4                                                                | 2                                                                |
| D <sub>calc</sub> (Mg/m <sup>3</sup> ) | 1.178 Mg/m <sup>3</sup>                                          | 1.290 Mg/m <sup>3</sup>                                          | 1.362 Mg/m <sup>3</sup>                                          |
| Wavelength (Å)                         | 1.54178 Å                                                        | 0.71073 Å                                                        | 0.71073 Å                                                        |
| T (K)                                  | 296 (2) K                                                        | 298 (2) K                                                        | 298 (2) K                                                        |
| No. of total reflns.                   | 62109                                                            | 101253                                                           | 99719                                                            |
| No. of indepnt.reflns.                 | 8097                                                             | 9304                                                             | 10063                                                            |
| R <sup>a</sup>                         | 0.0721                                                           | 0.0892                                                           | 0.0415                                                           |
| R <sup>b</sup>                         | 0.1922                                                           | 0.1759                                                           | 0.0946                                                           |
| Theta range for data collection        | 2.578 to 66.492°.                                                | 2.894 to 22.000°.                                                | 2.876 to 26.994°.                                                |
| Crystal size                           | 0.540 x 0.051 x 0.023 mm <sup>3</sup>                            | 0.550 x 0.080 x 0.037 mm <sup>3</sup>                            | 0.540 x 0.110 x 0.032 mm <sup>3</sup>                            |
| Refinement method                      | Full-matrix least-squares on F <sup>2</sup>                      | Full-matrix least-squares on F <sup>2</sup>                      | Full-matrix least-squares on F <sup>2</sup>                      |
| CCDC                                   | 2281590                                                          | 2331012                                                          | 2331015                                                          |

**Table S4.** Crystal structure data of  $H_2TPP(p-CH_3O-Ph)_2$ ,  $ZnTPP(m-CH_3O-Ph)_2$  &  $CuTPP(m-CH_3O-Ph)_2$ .

**Table S5.** Selected bond lengths (Å) and bond angles (°) of  $H_2TPP(p-CH_3O-Ph)_2$ ,  $ZnTPP(m-CH_3O-Ph)_2$  &  $CuTPP(m-CH_3O-Ph)_2$ .

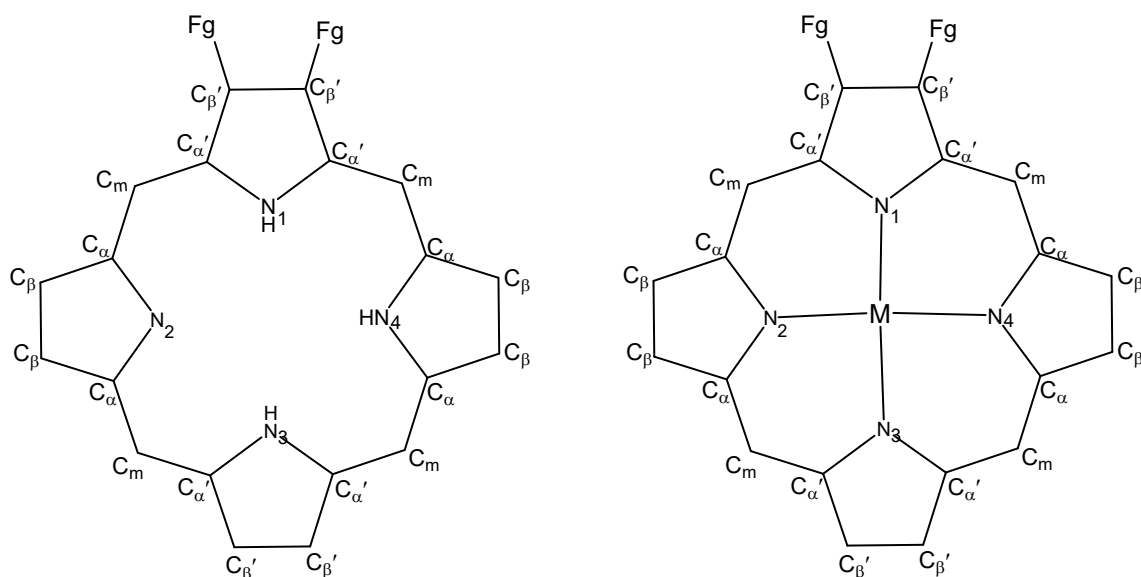

### Bond Length (Å)

|                                     | $H_2TPP(p-CH_3O-Ph)_2$ | $ZnTPP(m-CH_3O-Ph)_2$ | $CuTPP(m-CH_3O-Ph)_2$ |
|-------------------------------------|------------------------|-----------------------|-----------------------|
| M-N                                 | -                      | 2.065 (6)             | 1.987 (2)             |
| M-N'                                | -                      | 2.102 (6)             | 1.999 (2)             |
| N-C <sub>α</sub>                    | 1.381 (4)              | 1.377 (7)             | 1.380 (4)             |
| N'-C <sub>α'</sub>                  | 1.371 (3)              | 1.375 (7)             | 1.379 (3)             |
| C <sub>α</sub> -C <sub>β</sub>      | 1.445 (4)              | 1.446 (8)             | 1.435 (3)             |
| C <sub>α'</sub> -C <sub>β'</sub>    | 1.444 (4)              | 1.452 (7)             | 1.444 (2)             |
| C <sub>β</sub> -C <sub>β</sub>      | 1.344 (5)              | 1.343 (5)             | 1.348 (3)             |
| C <sub>β'</sub> -C <sub>β'</sub>    | 1.357 (4)              | 1.351 (8)             | 1.351 (3)             |
| C <sub>α</sub> -C <sub>m</sub>      | 1.397 (5)              | 1.406 (6)             | 1.397 (3)             |
| C <sub>α'</sub> -C <sub>m</sub>     | 1.401 (4)              | 1.409 (5)             | 1.395 (2)             |
| $\Delta C_{\beta}$ (Å) <sup>a</sup> | 0.014                  | 0.128                 | 0.558                 |
| $\Delta 24$ (Å) <sup>b</sup>        | 0.021                  | 0.098                 | 0.286                 |
| $\Delta Metal$ (Å)                  | -                      | 0.379                 | 0.066                 |

### Bond Angle (deg)

|                                    |            |             |            |
|------------------------------------|------------|-------------|------------|
| M-N-C <sub>α</sub>                 | -          | 125.77 (5)  | 126.29 (3) |
| M-N'-C <sub>α</sub>                | -          | 126.07 (6)  | 126.59 (4) |
| N-M-N                              | -          | 161.63 (10) | 173.82 (7) |
| N'-M-N'                            | -          | 160.78 (12) | 177.57 (9) |
| N-C <sub>α</sub> -C <sub>m</sub>   | 126.77 (4) | 126.24 (6)  | 125.39 (2) |
| N'-C <sub>α'</sub> -C <sub>m</sub> | 126.30 (5) | 125.37 (7)  | 124.63 (3) |

|                                                   |            |            |            |
|---------------------------------------------------|------------|------------|------------|
| N-C <sub>α</sub> -C <sub>β</sub>                  | 109.65 (3) | 109.32 (4) | 109.78 (2) |
| N'-C <sub>α'</sub> -C <sub>β'</sub>               | 106.62 (4) | 108.92 (5) | 109.67 (4) |
| C <sub>β</sub> -C <sub>α</sub> -C <sub>m</sub>    | 123.45 (4) | 124.37 (5) | 124.66 (3) |
| C <sub>β'</sub> -C <sub>α'</sub> -C <sub>m</sub>  | 127.31 (5) | 125.66 (4) | 125.49 (3) |
| C <sub>α</sub> -C <sub>m</sub> -C <sub>α'</sub>   | 125.42 (6) | 125.15 (6) | 123.31 (2) |
| C <sub>α</sub> -C <sub>β</sub> -C <sub>β</sub>    | 107.35 (4) | 107.39 (7) | 107.24 (2) |
| C <sub>α'</sub> -C <sub>β'</sub> -C <sub>β'</sub> | 108.11 (4) | 107.47 (4) | 107.17 (3) |
| C <sub>α</sub> -N-C <sub>α</sub>                  | 105.99 (5) | 106.54 (6) | 105.70 (4) |
| C <sub>α'</sub> -N-C <sub>α'</sub>                | 110.52 (5) | 107.41 (6) | 106.02 (4) |

<sup>a</sup>ΔC<sub>β</sub> refers to the mean plane displacement of the β-pyrrole carbons

<sup>b</sup>Δ24 refers to the mean plane deviation of 24-atom core

esd's for all given bond length and bond angles are ± 5%

**Table S6.** Selected bond lengths (Å), bond angles (°) and dipole moments for the B3LYP/6-31G optimized geometries of H<sub>2</sub>TPP(*p*-CH<sub>3</sub>O-Ph)<sub>2</sub>, H<sub>2</sub>TPP(*m*-CH<sub>3</sub>O-Ph)<sub>2</sub> & H<sub>2</sub>TPP(*m,p*-CH<sub>3</sub>O-Ph)<sub>2</sub>.

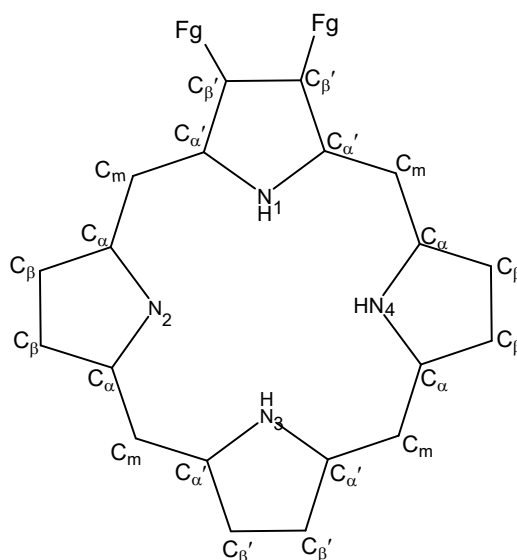

**Bond Length (Å)**

|                                  | H <sub>2</sub> TPP( <i>p</i> -CH <sub>3</sub> O-Ph) <sub>2</sub> | H <sub>2</sub> TPP( <i>m</i> -CH <sub>3</sub> O-Ph) <sub>2</sub> | H <sub>2</sub> TPP( <i>m,p</i> -CH <sub>3</sub> O-Ph) <sub>2</sub> |
|----------------------------------|------------------------------------------------------------------|------------------------------------------------------------------|--------------------------------------------------------------------|
| N-C <sub>α</sub>                 | 1.366                                                            | 1.365                                                            | 1.367                                                              |
| N'-C <sub>α'</sub>               | 1.375                                                            | 1.372                                                            | 1.375                                                              |
| C <sub>α</sub> -C <sub>β</sub>   | 1.460                                                            | 1.413                                                            | 1.459                                                              |
| C <sub>α'</sub> -C <sub>β'</sub> | 1.439                                                            | 1.408                                                            | 1.439                                                              |
| C <sub>β</sub> -C <sub>β</sub>   | 1.353                                                            | 1.352                                                            | 1.351                                                              |
| C <sub>β'</sub> -C <sub>β'</sub> | 1.380                                                            | 1.379                                                            | 1.380                                                              |
| C <sub>α</sub> -C <sub>m</sub>   | 1.413                                                            | 1.460                                                            | 1.416                                                              |
| C <sub>α'</sub> -C <sub>m</sub>  | 1.409                                                            | 1.439                                                            | 1.412                                                              |
| ΔC <sub>β</sub> (Å) <sup>a</sup> | 0.430                                                            | 0.480                                                            | 0.490                                                              |
| Δ24 (Å) <sup>b</sup>             | 0.220                                                            | 0.232                                                            | 0.241                                                              |

### Bond Angle (deg)

|                                                   | H <sub>2</sub> TPP( <i>p</i> -CH <sub>3</sub> O-Ph) <sub>2</sub> | H <sub>2</sub> TPP( <i>m</i> -CH <sub>3</sub> O-Ph) <sub>2</sub> | H <sub>2</sub> TPP( <i>m,p</i> -CH <sub>3</sub> O-Ph) <sub>2</sub> |
|---------------------------------------------------|------------------------------------------------------------------|------------------------------------------------------------------|--------------------------------------------------------------------|
| N-C <sub>α</sub> -C <sub>m</sub>                  | 126.15                                                           | 126.23                                                           | 126.29                                                             |
| N'-C <sub>α'</sub> -C <sub>m</sub>                | 125.31                                                           | 125.41                                                           | 125.25                                                             |
| N-C <sub>α</sub> -C <sub>β</sub>                  | 110.85                                                           | 110.86                                                           | 110.61                                                             |
| N'-C <sub>α'</sub> -C <sub>β'</sub>               | 106.46                                                           | 106.43                                                           | 106.40                                                             |
| C <sub>β</sub> -C <sub>α</sub> -C <sub>m</sub>    | 122.95                                                           | 122.87                                                           | 122.80                                                             |
| C <sub>β'</sub> -C <sub>α'</sub> -C <sub>m</sub>  | 128.17                                                           | 127.62                                                           | 128.27                                                             |
| C <sub>α</sub> -C <sub>m</sub> -C <sub>α'</sub>   | 124.80                                                           | 124.82                                                           | 124.85                                                             |
| C <sub>α</sub> -C <sub>β</sub> -C <sub>β</sub>    | 106.35                                                           | 106.35                                                           | 106.35                                                             |
| C <sub>α'</sub> -C <sub>β'</sub> -C <sub>β'</sub> | 107.93                                                           | 107.95                                                           | 107.96                                                             |
| C <sub>α</sub> -C <sub>n</sub> -C <sub>α</sub>    | 105.51                                                           | 105.49                                                           | 105.85                                                             |
| C <sub>α'</sub> -C <sub>n</sub> -C <sub>α'</sub>  | 111.05                                                           | 111.09                                                           | 111.12                                                             |
| Dipole moment                                     | 2.3734 D                                                         | 5.1528 D                                                         | 2.7013 D                                                           |

<sup>a</sup>ΔC<sub>β</sub> refers to the mean plane displacement of the β-pyrrole carbons

<sup>b</sup>Δ24 refers to the mean plane deviation of 24-atom core

esd's for all given bond length and bond angles are ± 5%

**Table S7.** Selected bond lengths (Å), bond angles (°) and dipole moment for the B3LYP/LANL2DZ optimized geometries of ZnTPP(*p*-CH<sub>3</sub>O-Ph)<sub>2</sub>, ZnTPP(*m*-CH<sub>3</sub>O-Ph)<sub>2</sub> & ZnTPP(*m,p*-CH<sub>3</sub>O-Ph)<sub>2</sub>.

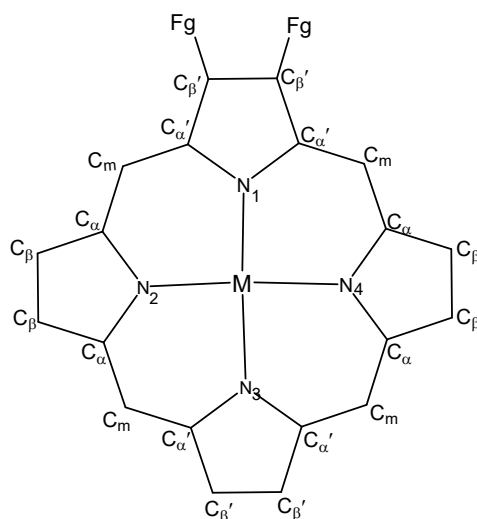

### Bond Length (Å)

|                                  | ZnTPP( <i>p</i> -CH <sub>3</sub> O-Ph) <sub>2</sub> | ZnTPP( <i>m</i> -CH <sub>3</sub> O-Ph) <sub>2</sub> | ZnTPP( <i>m,p</i> -CH <sub>3</sub> O-Ph) <sub>2</sub> |
|----------------------------------|-----------------------------------------------------|-----------------------------------------------------|-------------------------------------------------------|
| M-N                              | 2.058                                               | 2.055                                               | 2.053                                                 |
| M-N'                             | 2.083                                               | 2.087                                               | 2.081                                                 |
| N-C <sub>α</sub>                 | 1.375                                               | 1.376                                               | 1.378                                                 |
| N'-C <sub>α'</sub>               | 1.375                                               | 1.374                                               | 1.372                                                 |
| C <sub>α</sub> -C <sub>β</sub>   | 1.446                                               | 1.447                                               | 1.449                                                 |
| C <sub>α</sub> -C <sub>β'</sub>  | 1.452                                               | 1.453                                               | 1.456                                                 |
| C <sub>β</sub> -C <sub>β</sub>   | 1.364                                               | 1.362                                               | 1.360                                                 |
| C <sub>β</sub> -C <sub>β'</sub>  | 1.371                                               | 1.369                                               | 1.365                                                 |
| C <sub>α</sub> -C <sub>m</sub>   | 1.412                                               | 1.412                                               | 1.412                                                 |
| C <sub>α'</sub> -C <sub>m</sub>  | 1.414                                               | 1.416                                               | 1.416                                                 |
| ΔC <sub>β</sub> (Å) <sup>a</sup> | 0.425                                               | 0.388                                               | 0.370                                                 |
| Δ24 (Å) <sup>b</sup>             | 0.203                                               | 0.186                                               | 0.177                                                 |
| ΔMetal (Å)                       | 0.017                                               | 0.014                                               | 0.016                                                 |

### Bond Angle (deg)

|                                                  | ZnTPP( <i>p</i> -CH <sub>3</sub> O-Ph) <sub>2</sub> | ZnTPP( <i>m</i> -CH <sub>3</sub> O-Ph) <sub>2</sub> | ZnTPP( <i>m,p</i> -CH <sub>3</sub> O-Ph) <sub>2</sub> |
|--------------------------------------------------|-----------------------------------------------------|-----------------------------------------------------|-------------------------------------------------------|
| M-N-C <sub>α</sub>                               | 125.62                                              | 125.76                                              | 125.821                                               |
| M-N'-C <sub>α</sub>                              | 125.63                                              | 125.68                                              | 125.73                                                |
| N-M-N                                            | 179.04                                              | 179.27                                              | 179.23                                                |
| N'-M-N'                                          | 179.25                                              | 179.40                                              | 179.47                                                |
| N-C <sub>α</sub> -C <sub>m</sub>                 | 126.05                                              | 126.17                                              | 126.21                                                |
| N'-C <sub>α'</sub> -C <sub>m</sub>               | 124.93                                              | 124.91                                              | 124.95                                                |
| N-C <sub>α</sub> -C <sub>β</sub>                 | 109.06                                              | 109.07                                              | 109.53                                                |
| N'-C <sub>α'</sub> -C <sub>β'</sub>              | 109.25                                              | 109.19                                              | 109.19                                                |
| C <sub>β</sub> -C <sub>α</sub> -C <sub>m</sub>   | 124.86                                              | 124.73                                              | 124.69                                                |
| C <sub>β'</sub> -C <sub>α'</sub> -C <sub>m</sub> | 125.80                                              | 125.86                                              | 125.83                                                |
| C <sub>α</sub> -C <sub>m</sub> -C <sub>α'</sub>  | 125.37                                              | 125.22                                              | 125.52                                                |
| C <sub>α</sub> -C <sub>β</sub> -C <sub>β</sub>   | 107.20                                              | 107.24                                              | 107.28                                                |
| C <sub>α</sub> -C <sub>β</sub> -C <sub>β'</sub>  | 106.92                                              | 106.94                                              | 106.87                                                |
| C <sub>α</sub> -C <sub>n</sub> -C <sub>α</sub>   | 107.41                                              | 107.43                                              | 107.42                                                |
| C <sub>α</sub> -C <sub>n</sub> -C <sub>α'</sub>  | 107.52                                              | 107.57                                              | 107.58                                                |
| Dipole moment                                    | 2.313 D                                             | 2.203 D                                             | 2.871 D                                               |

<sup>a</sup>ΔC<sub>β</sub> refers to the mean plane displacement of the β-pyrrole carbons

<sup>b</sup>Δ24 refers to the mean plane deviation of 24-atom core

esd's for all given bond length and bond angles are  $\pm 5\%$

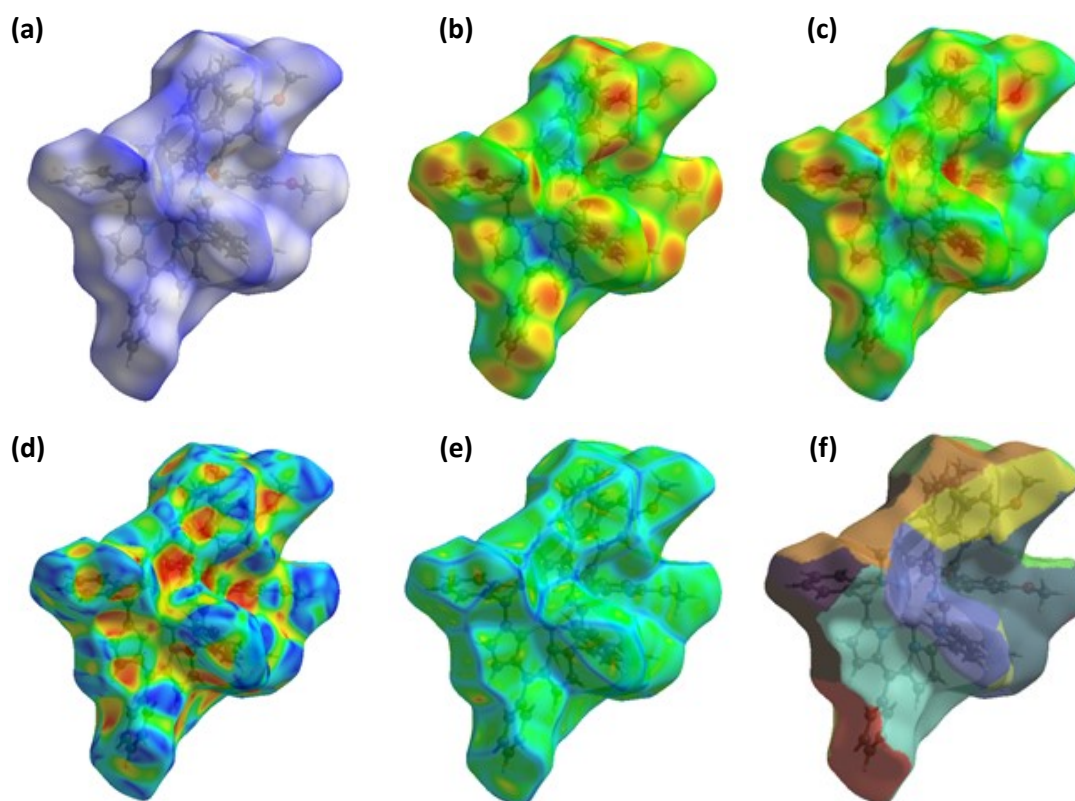

**Figure S9.** (a) Represent the dnrm plot, (b) represent the di plot, (c) represent the de plot, (d) represent the shape index (e) represent the curvedness plot and (f) represent the fragment patches with selected network of interaction of ZnTPP(*m*-CH<sub>3</sub>O-Ph)<sub>2</sub>.

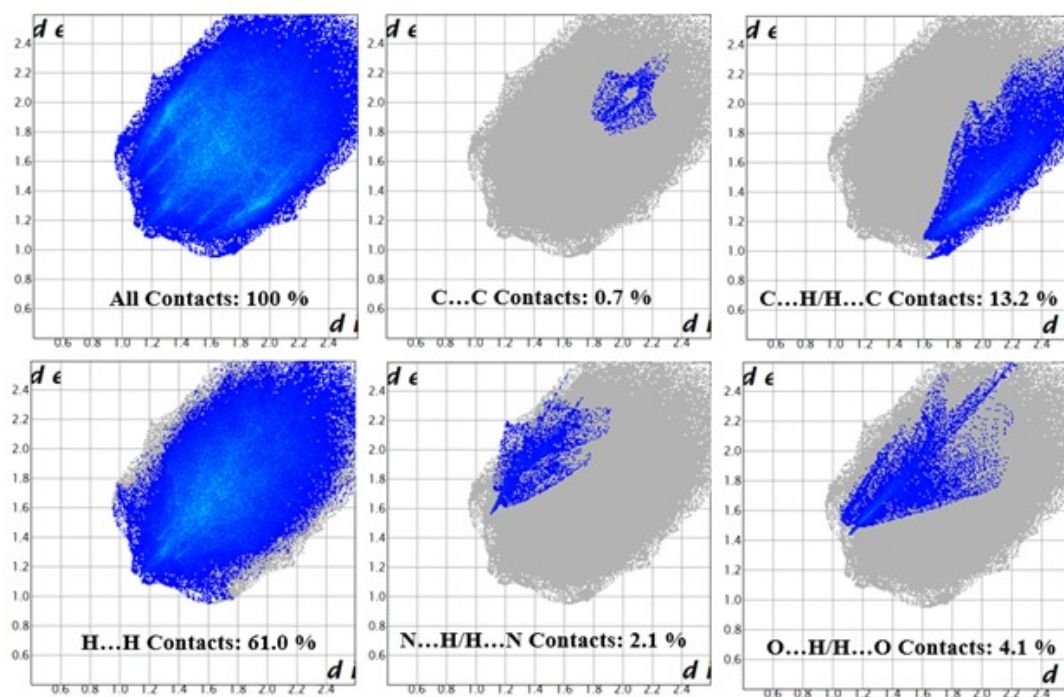

**Figure S10.** 2D-fingerprint plots showing relative contribution of different types of interactions between atoms in crystal packing of ZnTPP(*m*-CH<sub>3</sub>O-Ph)<sub>2</sub>. The di and de values are the closest



internal and external distances (in Å) from given points on the Hirshfeld surface of ZnTPP(*m*-CH<sub>3</sub>O-Ph)<sub>2</sub>.

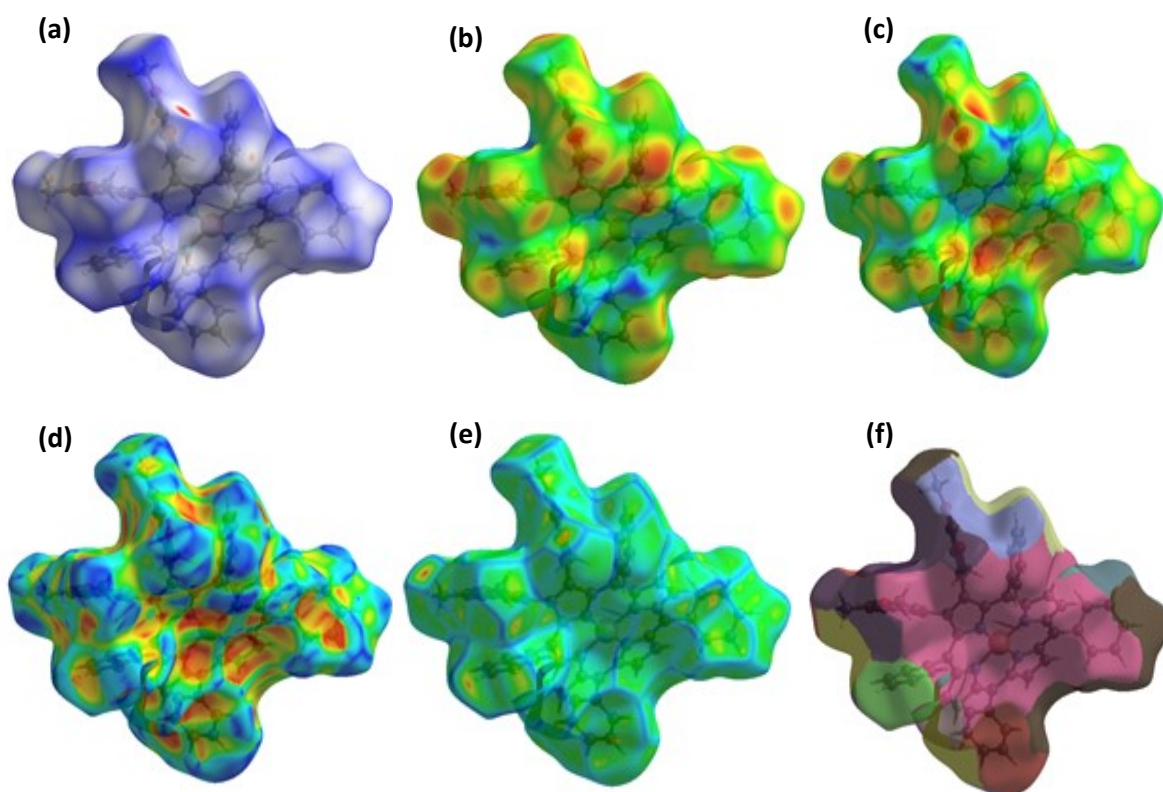

**Figure S11.** (a) Represent the  $d_{\text{norm}}$  plot, (b) represent the  $d_i$  plot, (c) represent the  $d_e$  plot, (d) represent the shape index (e) represent the curvedness plot and (f) represent the fragment patches with selected network of interaction of CuTPP(*m*-CH<sub>3</sub>O-Ph)<sub>2</sub>.

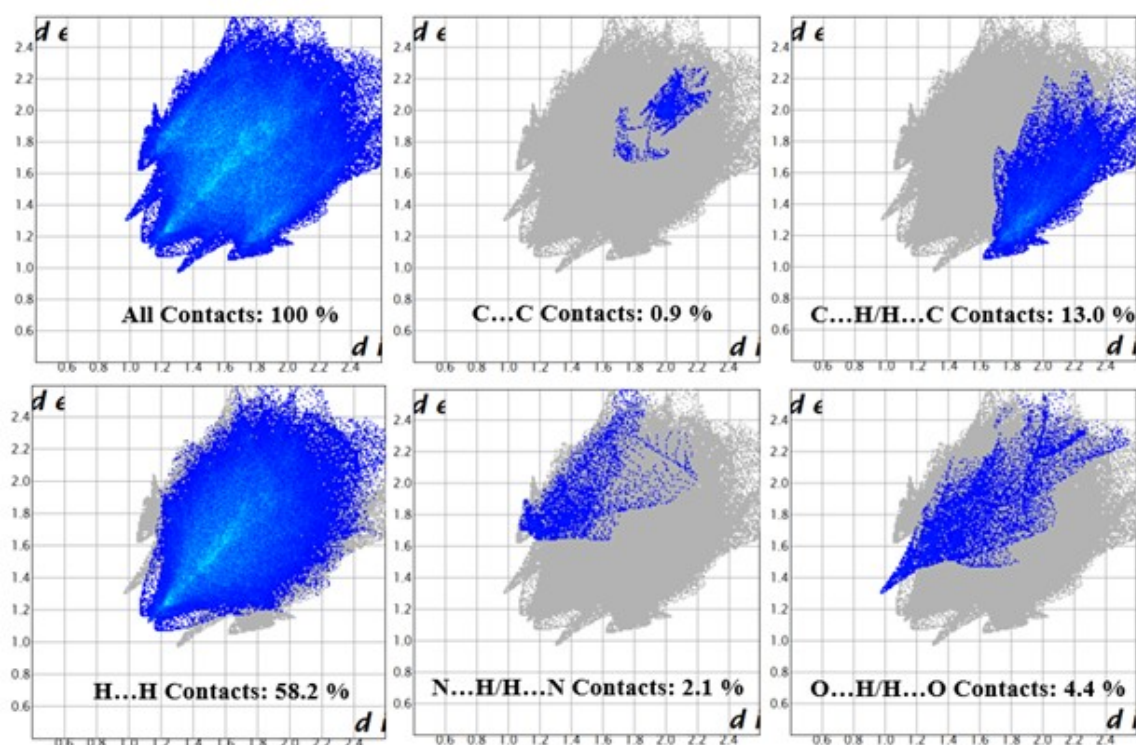

**Figure S12.** 2D-fingerprint plots showing relative contribution of different types of interactions between atoms in crystal packing of  $\text{CuTPP}(m\text{-CH}_3\text{O-Ph})_2$ . The di and de values are the closest internal and external distances (in  $\text{\AA}$ ) from given points on the hirshfeld surface of  $\text{CuTPP}(m\text{-CH}_3\text{O-Ph})_2$ .

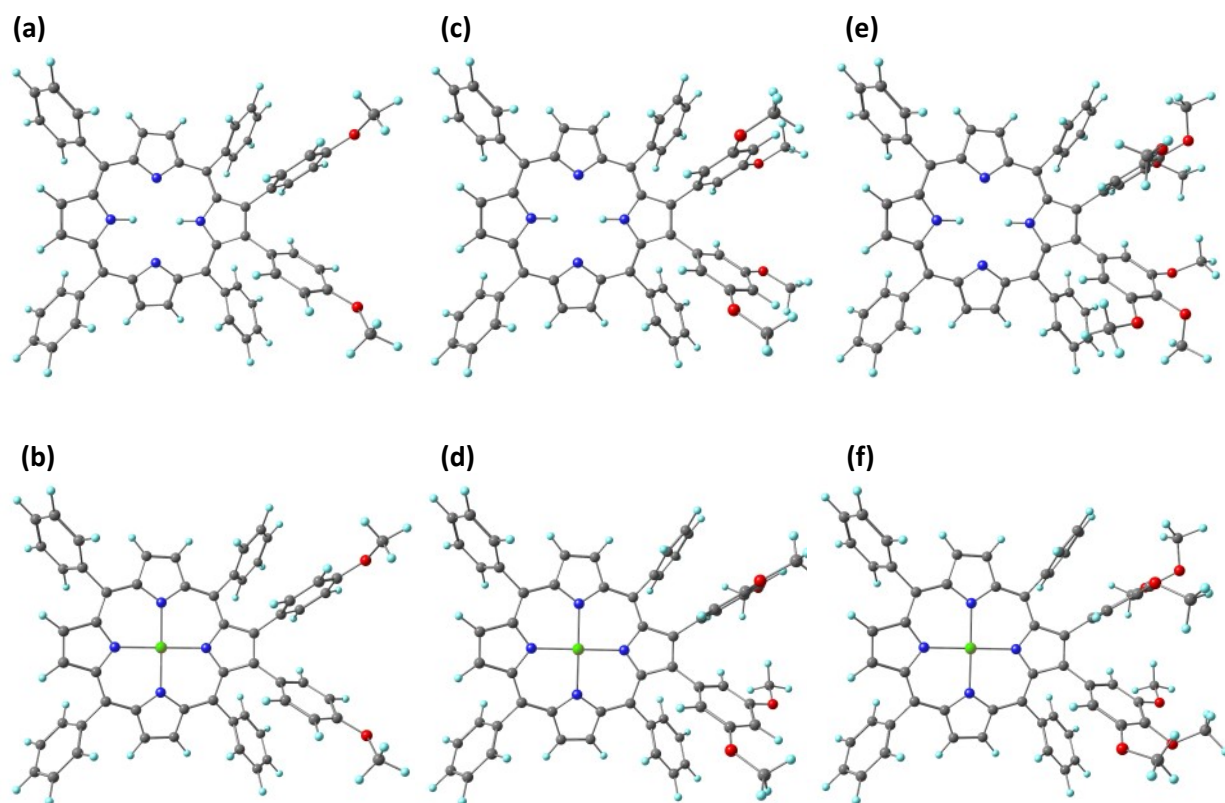

**Figure S13.** Optimized structures of synthesized molecules  $\text{MTPP}(p\text{-CH}_3\text{O-Ph})_2$ ,  $\text{M} = 2\text{H}$ ,  $\text{Zn}$  (a, b),  $\text{MTPP}(m\text{-CH}_3\text{O-Ph})_2$ ,  $\text{M} = 2\text{H}$ ,  $\text{Zn}$  (c, d) &  $\text{MTPP}(m,p\text{-CH}_3\text{O-Ph})_2$ ,  $\text{M} = 2\text{H}$ ,  $\text{Zn}$  (e, f) respectively, by using B3LYP-6-31G (d, p) level of theory in combination with LANL2DZ basis set.

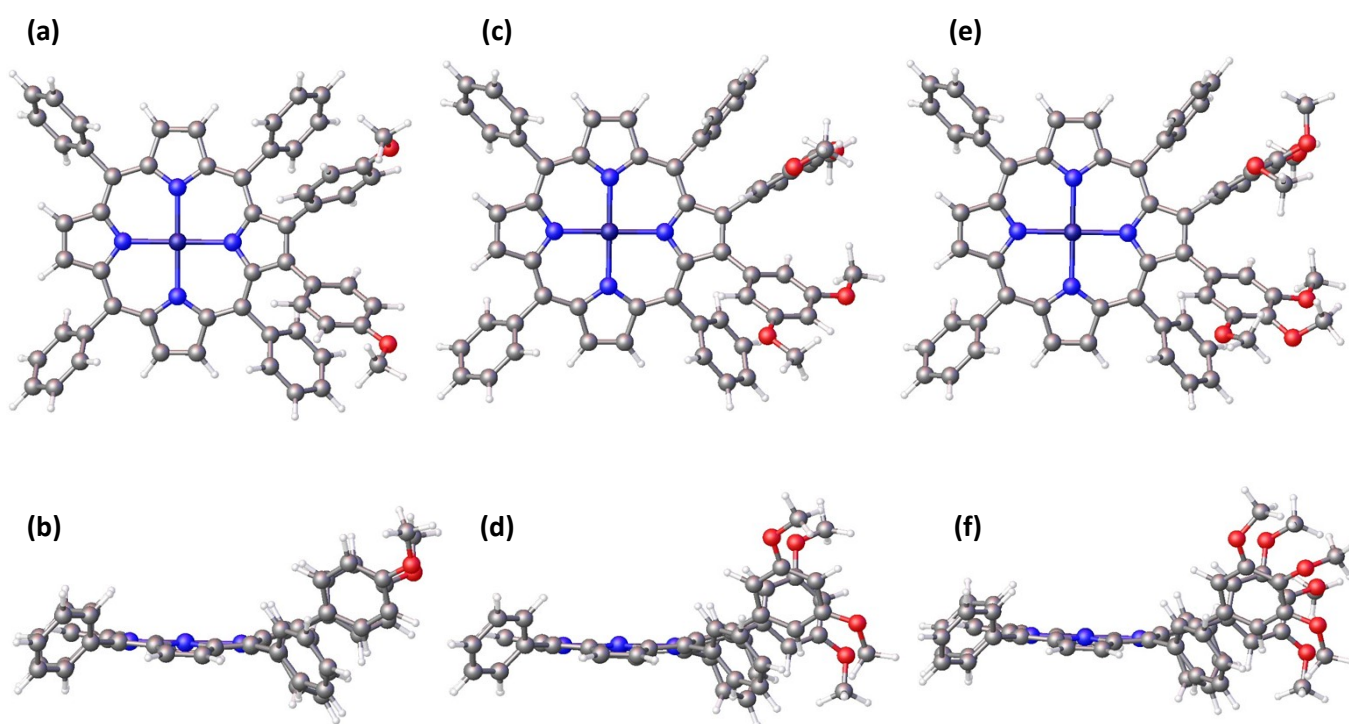

**Figure S14.** B3LYP/LanL2DZ optimized geometries showing top as well as side views of ZnTPP(*p*-CH<sub>3</sub>O-Ph)<sub>2</sub> (a & b), ZnTPP(*m*-CH<sub>3</sub>O-Ph)<sub>2</sub> (c & d) and ZnTPP(*m,p*-CH<sub>3</sub>O-Ph)<sub>2</sub> (e & f).

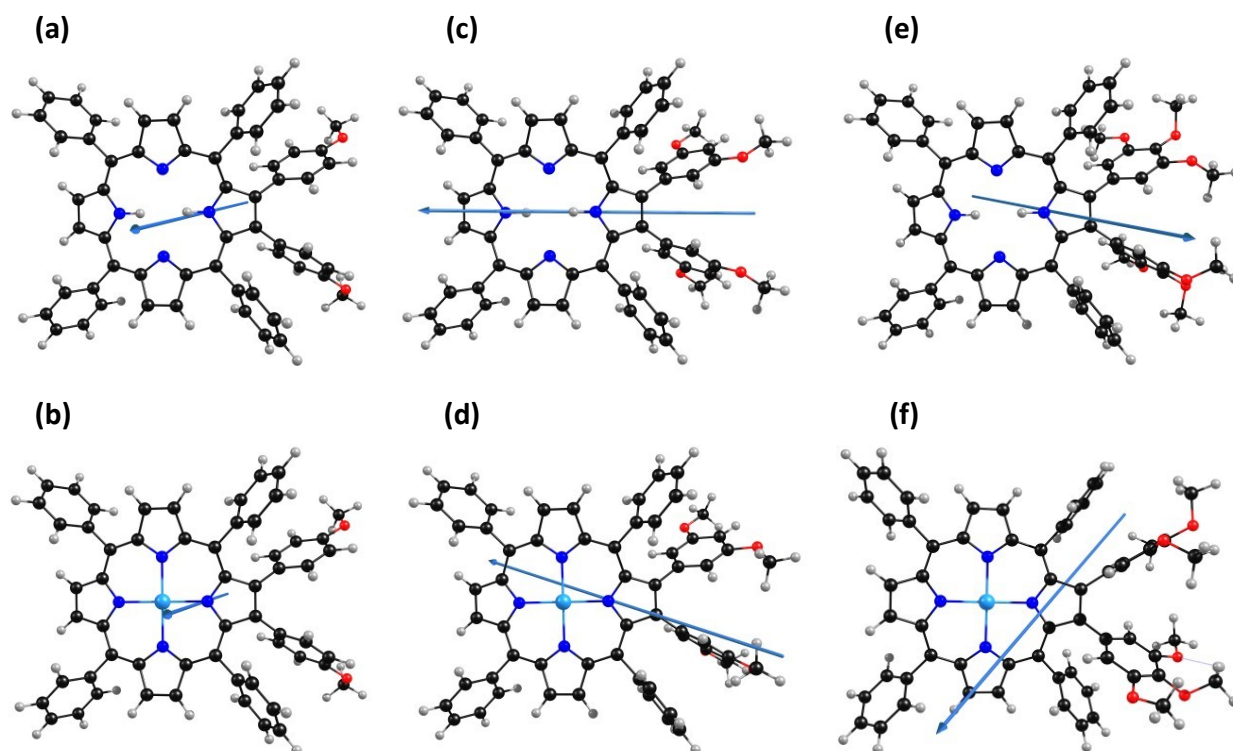

**Figure S15.** B3LYP/6-31G optimized geometries showing direction of dipole moment of MTPP(*p*-CH<sub>3</sub>O-Ph)<sub>2</sub>, M = 2H, Zn (a, b), MTPP(*m*-CH<sub>3</sub>O-Ph)<sub>2</sub>, M = 2H, Zn (c, d) & MTPP(*m,p*-CH<sub>3</sub>O-Ph)<sub>2</sub>, M = 2H, Zn (e, f) respectively. by using B3LYP-6-31G (d, p) level of theory in combination with LANL2DZ basis set Color codes for atoms: C (black), N (blue), H (white) and O (red) and Zn (light blue).

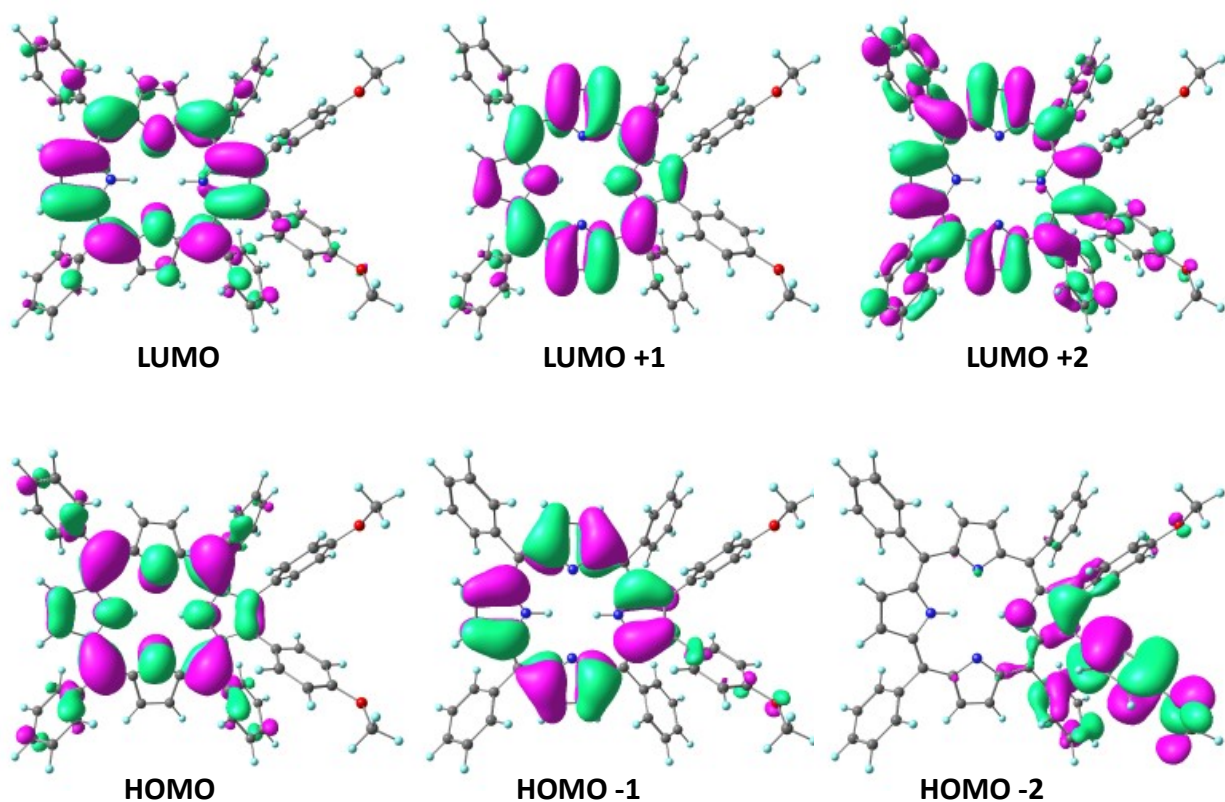

**Figure S16.** B3LYP/6-31G optimized geometries showing Frontier Molecular Orbitals (FMOs) of  $\text{H}_2\text{TPP}(p\text{-CH}_3\text{O-Ph})_2$  respectively (having isosurface contour value of 0.03).

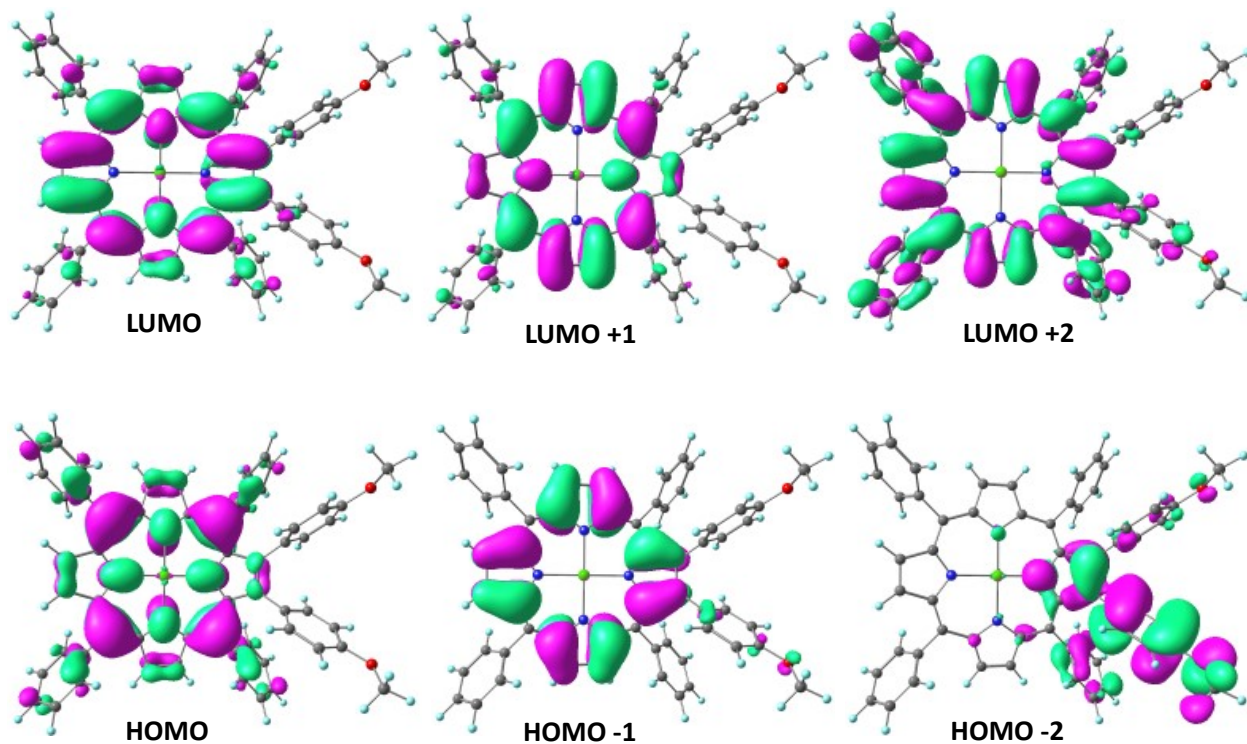

**Figure S17.** B3LYP/6-31G optimized geometries showing Frontier Molecular Orbitals (FMOs) of  $\text{ZnTPP}(p\text{-CH}_3\text{O-Ph})_2$  respectively (having isosurface contour value of 0.03).

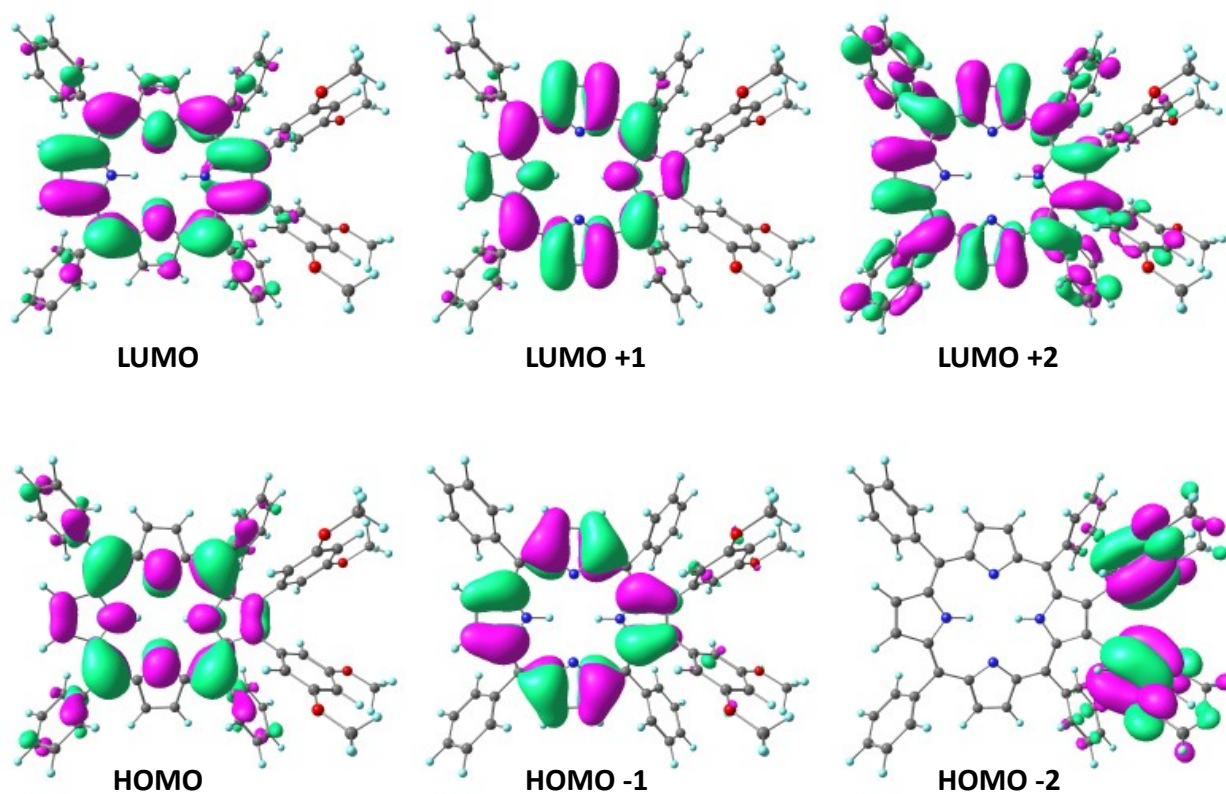

**Figure S18.** B3LYP/6-31G optimized geometries showing Frontier Molecular Orbitals (FMOs) of  $\text{H}_2\text{TPP}(m\text{-CH}_3\text{O-Ph})_2$  respectively (having isosurface contour value of 0.03).

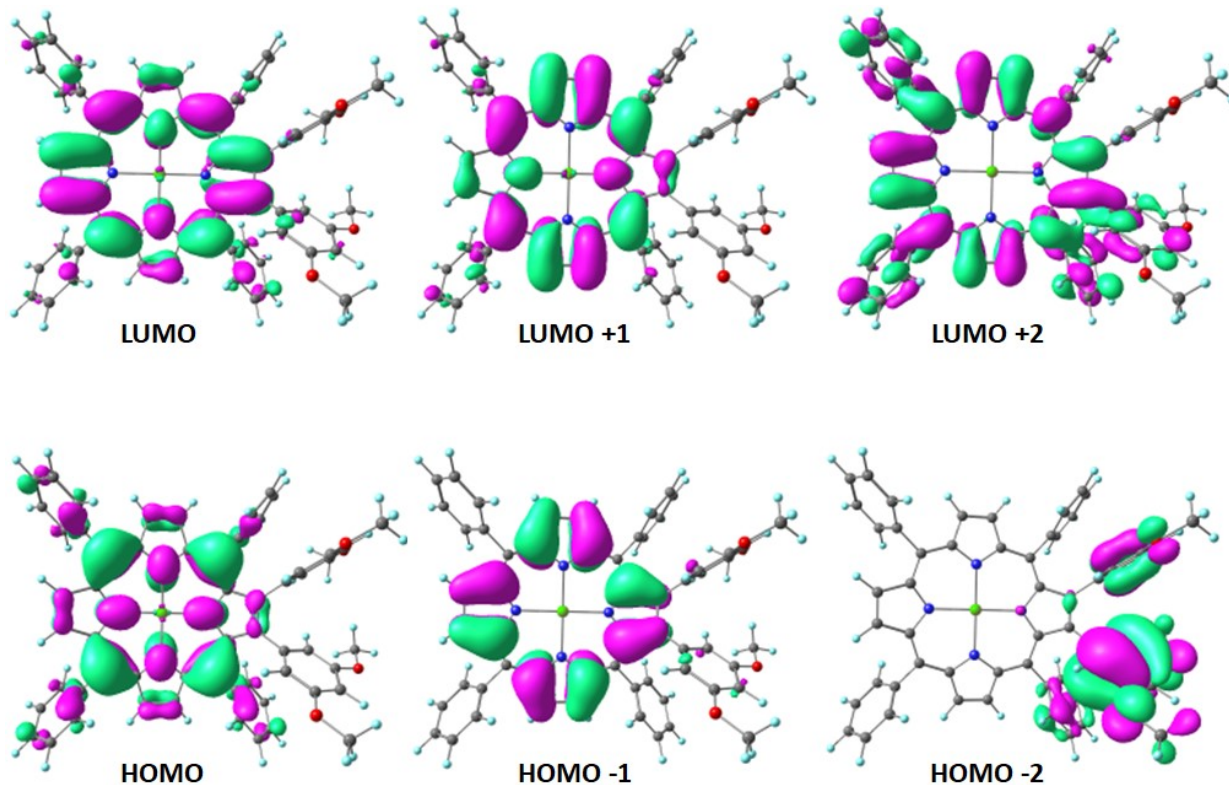

**Figure S19.** B3LYP/6-31G optimized geometries showing Frontier Molecular Orbitals (FMOs) of  $\text{H}_2\text{TPP}(m\text{-CH}_3\text{O-Ph})_2$  respectively (having isosurface contour value of 0.03).

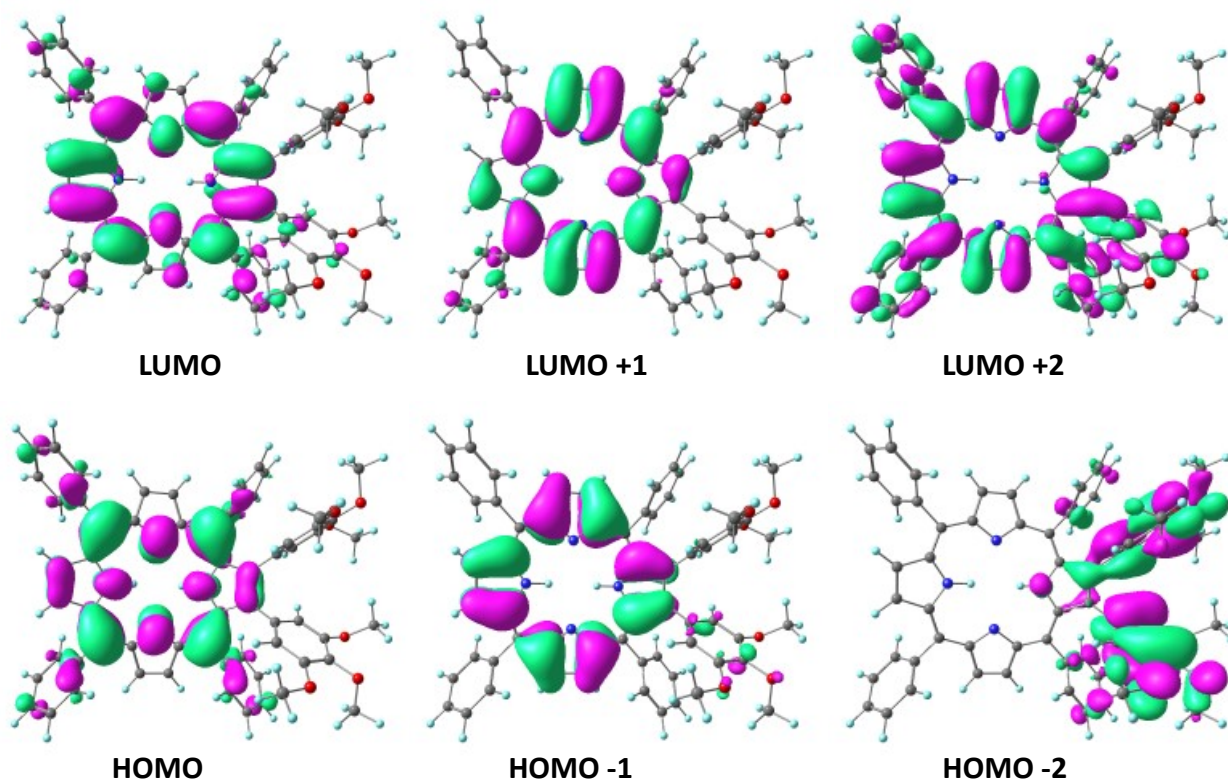

**Figure S20.** B3LYP/6-31G optimized geometries showing Frontier Molecular Orbitals (FMOs) of  $\text{H}_2\text{TPP}(m,p\text{-CH}_3\text{O-Ph})_2$  respectively (having isosurface contour value of 0.03).

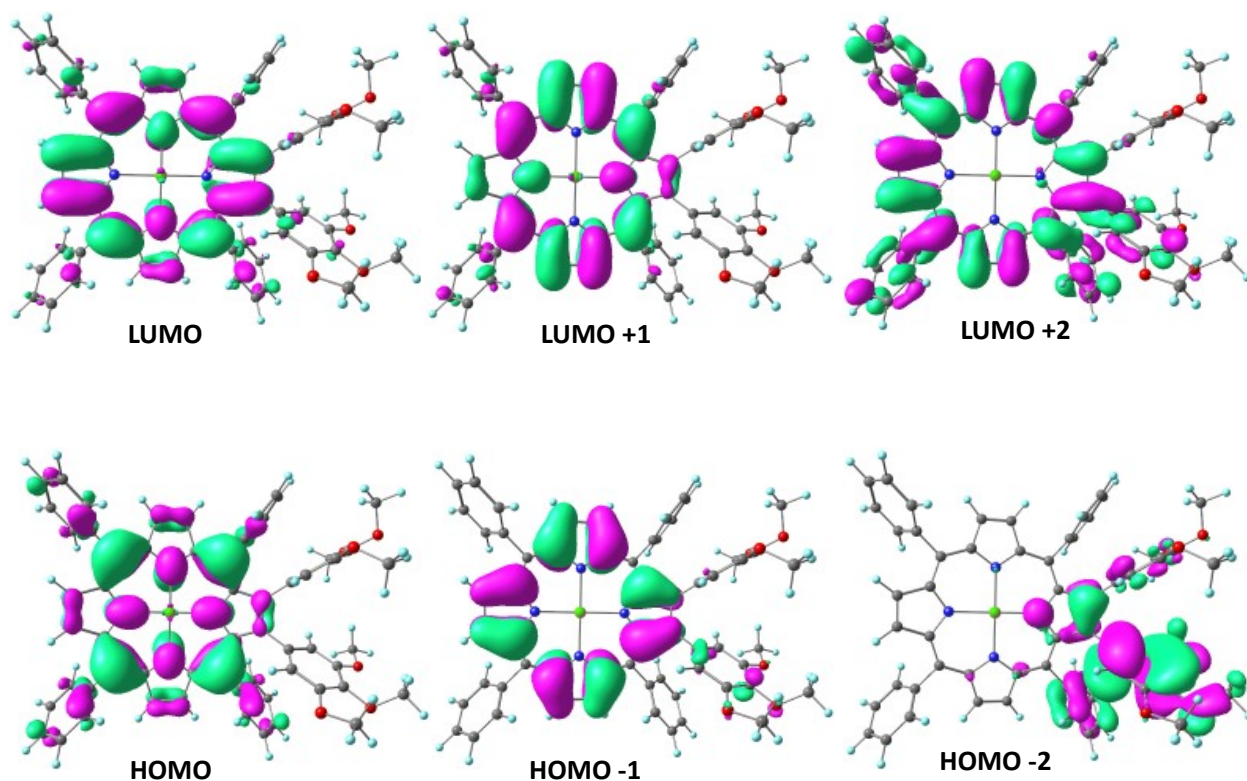

**Figure S21.** B3LYP/6-31G optimized geometries showing Frontier Molecular Orbitals (FMOs) of  $\text{ZnTPP}(m,p\text{-CH}_3\text{O-Ph})_2$  respectively (having isosurface contour value of 0.03).

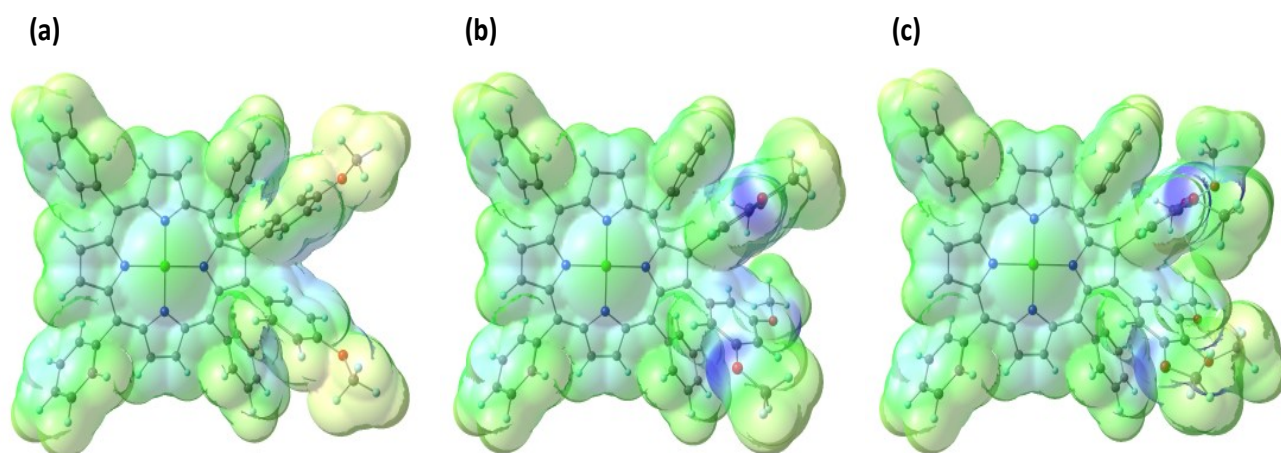

**Figure S22.** Molecular electrostatic potential (MEP) Zinc porphyrins:(a)  $\text{ZnTPP}(p\text{-CH}_3\text{O-Ph})_2$  (b)  $\text{ZnTPP}(m\text{-CH}_3\text{O-Ph})_2$  and (c)  $\text{ZnTPP}(m,p\text{-CH}_3\text{O-Ph})_2$  using the B3LYP/ 6 31G (d, p) technique in the Gaussian 16W, in gas phase.

**Table S8.** The calculated Absorption, Oscillator strength, Molecular Transitions (M.T.), % weight contribution (% Ci > 10) of synthesized [ZnTPP(R)<sub>2</sub>] R = *p*-CH<sub>3</sub>O-Ph, *m*-CH<sub>3</sub>O-Ph & *m,p*-CH<sub>3</sub>O-Ph] at B3LYP-6-31G (d, p) level of theory in combination with LANL2DZ basis set.

| Compounds                                             | State | Molecular transitions (M.T) | Excited state energy (eV) | Weight contribution (%Ci) | Calculated $\lambda$ (nm) in DCM | Oscillatory strength (f) | Experimental $\lambda$ (nm) in DCM |
|-------------------------------------------------------|-------|-----------------------------|---------------------------|---------------------------|----------------------------------|--------------------------|------------------------------------|
| ZnTPP( <i>p</i> -CH <sub>3</sub> O-Ph) <sub>2</sub>   | S1    | H-1 $\rightarrow$ L+1       | 2.1826 eV                 | 30                        | 568                              | 0.0753                   | 589                                |
|                                                       |       | H $\rightarrow$ L           |                           | 69                        |                                  |                          |                                    |
|                                                       | S2    | H-1 $\rightarrow$ L         | 2.2076 eV                 | 37                        | 562                              | 0.0261                   | 553                                |
|                                                       |       | H $\rightarrow$ L+1         |                           | 62                        |                                  |                          |                                    |
|                                                       | S3    | H-2 $\rightarrow$ L         | 2.7977 eV                 | 79                        | 443                              | 0.1741                   | 486                                |
|                                                       |       |                             |                           |                           |                                  |                          |                                    |
|                                                       | S4    | H-3 $\rightarrow$ L         | 2.9252 eV                 | 89                        | 424                              | 0.0382                   | 425                                |
|                                                       |       |                             |                           |                           |                                  |                          |                                    |
|                                                       | S5    | H-3 $\rightarrow$ L+1       | 2.9348 eV                 | 61                        | 422                              | 0.4469                   |                                    |
|                                                       |       | H-2 $\rightarrow$ L         |                           | 14                        |                                  |                          |                                    |
| H-2 $\rightarrow$ L+1                                 |       |                             | 10                        |                           |                                  |                          |                                    |
| ZnTPP( <i>m</i> -CH <sub>3</sub> O-Ph) <sub>2</sub>   | S1    | H-1 $\rightarrow$ L+1       | 2.1963eV                  | 31                        | 565                              | 0.0658                   | 594                                |
|                                                       |       | H $\rightarrow$ L           |                           | 68                        |                                  |                          |                                    |
|                                                       | S2    | H-1 $\rightarrow$ L         | 2.2196 eV                 | 39                        | 559                              | 0.0192                   | 552                                |
|                                                       |       | H $\rightarrow$ L+1         |                           | 61                        |                                  |                          |                                    |
|                                                       | S3    | H-2 $\rightarrow$ L         | 2.7832 eV                 | 97                        | 446                              | 0.004                    | 487                                |
|                                                       | S4    | H-3 $\rightarrow$ L         | 2.9038 eV                 | 19                        | 427                              | 0.021                    | 423                                |
|                                                       |       | H-2 $\rightarrow$ L+1       |                           | 79                        |                                  |                          |                                    |
|                                                       | S5    | H-3 $\rightarrow$ L         | 2.9227 eV                 | 51                        | 424                              | 0.4361                   |                                    |
|                                                       |       | H-2 $\rightarrow$ L+1       |                           | 18                        |                                  |                          |                                    |
|                                                       |       | H-1 $\rightarrow$ L         |                           | 16                        |                                  |                          |                                    |
| ZnTPP( <i>m,p</i> -CH <sub>3</sub> O-Ph) <sub>2</sub> | S1    | H-1 $\rightarrow$ L+1       | 2.2021 eV                 | 32                        | 563                              | 0.0605                   | 592                                |
|                                                       |       | H $\rightarrow$ L           |                           | 68                        |                                  |                          |                                    |
|                                                       | S2    | H-1 $\rightarrow$ L         | 2.236 eV                  | 39                        | 558                              | 0.0168                   | 551                                |
|                                                       |       | H $\rightarrow$ L+1         |                           | 60                        |                                  |                          |                                    |
|                                                       | S3    | H-2 $\rightarrow$ L         | 2.8053 eV                 | 85                        | 442                              | 0.1536                   | 486                                |
|                                                       | S4    | H-2 $\rightarrow$ L+1       |                           | 77                        |                                  | 0.1641                   |                                    |
|                                                       | S5    | H-3 $\rightarrow$ L         | 2.9384 eV                 | 89                        | 419                              | 0.0138                   | 422                                |

**Figure S23.**  $^1\text{H}$  NMR spectrum of  $\text{H}_2\text{TPP}(p\text{-CH}_3\text{O-Ph})_2$  in  $\text{CDCl}_3$  at 298 K.

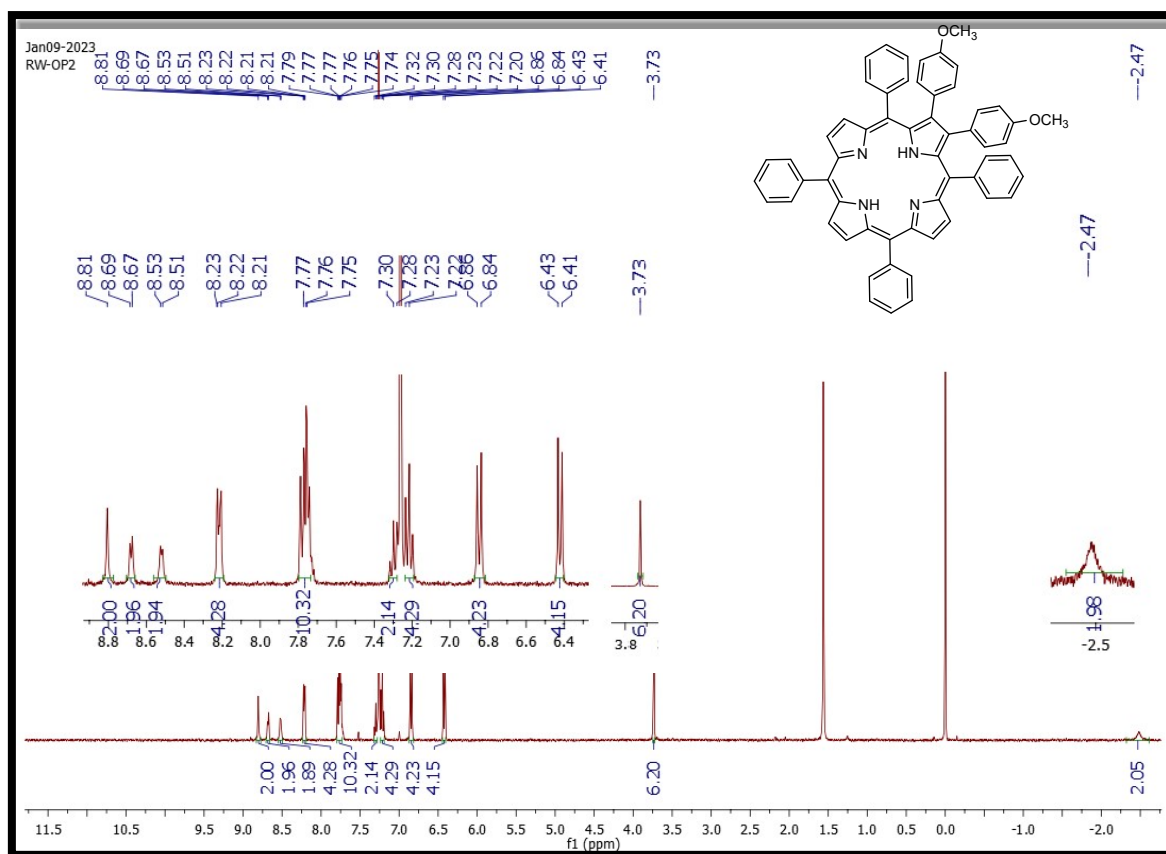

**Figure S24.**  $^1\text{H}$  NMR spectrum of  $\text{ZnTPP}(p\text{-CH}_3\text{O-Ph})_2$  in  $\text{CDCl}_3$  at 298 K.

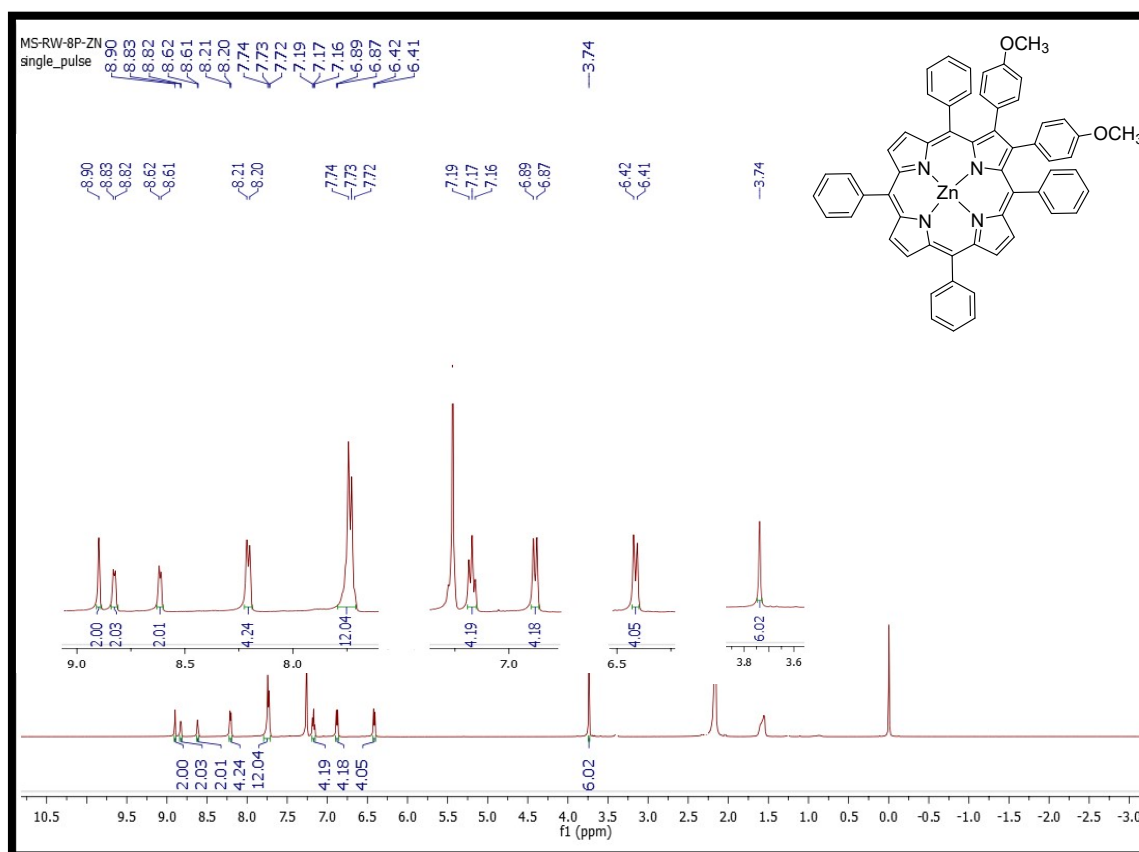





**Figure S27.**  $^1\text{H}$  NMR spectrum of  $\text{ZnTPP}(m\text{-CH}_3\text{O-Ph})_2$  in  $\text{CDCl}_3$  at 298 K.

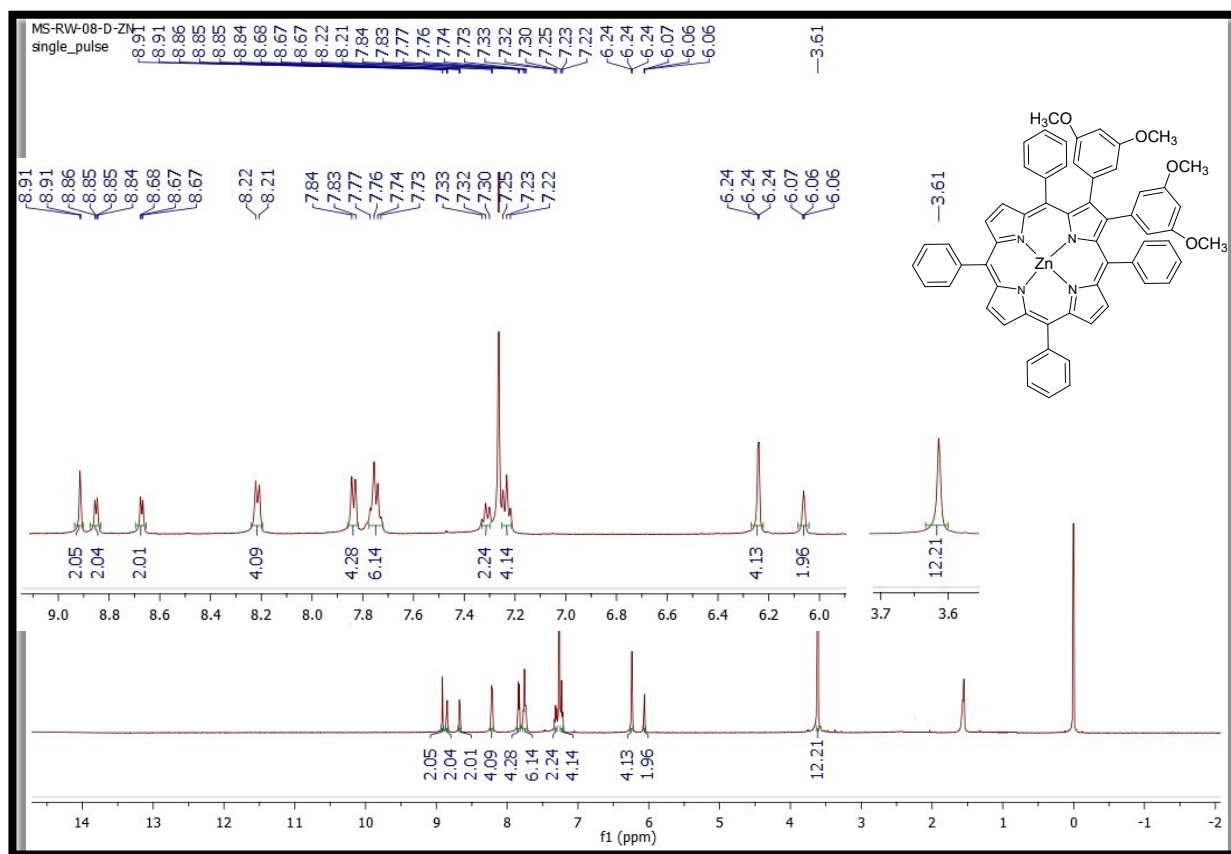

**Figure S28.**  $^1\text{H}$  NMR spectrum of  $\text{NiTPP}(m\text{-CH}_3\text{O-Ph})_2$  in  $\text{CDCl}_3$  at 298 K.

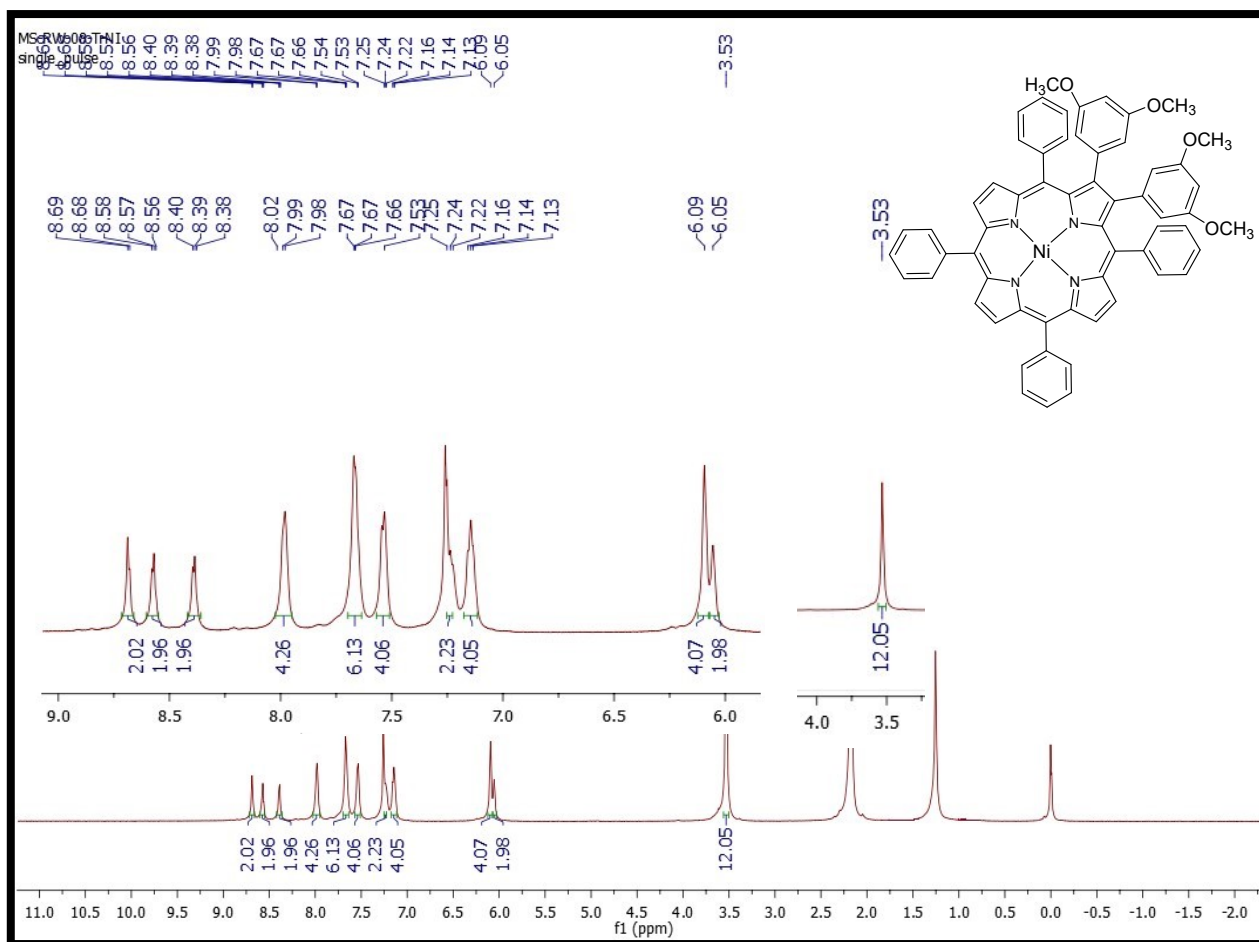

Figure S29. <sup>1</sup>H NMR spectrum of H<sub>2</sub>TPP(*m,p*-CH<sub>3</sub>O-Ph)<sub>2</sub> in CDCl<sub>3</sub> at 298 K.

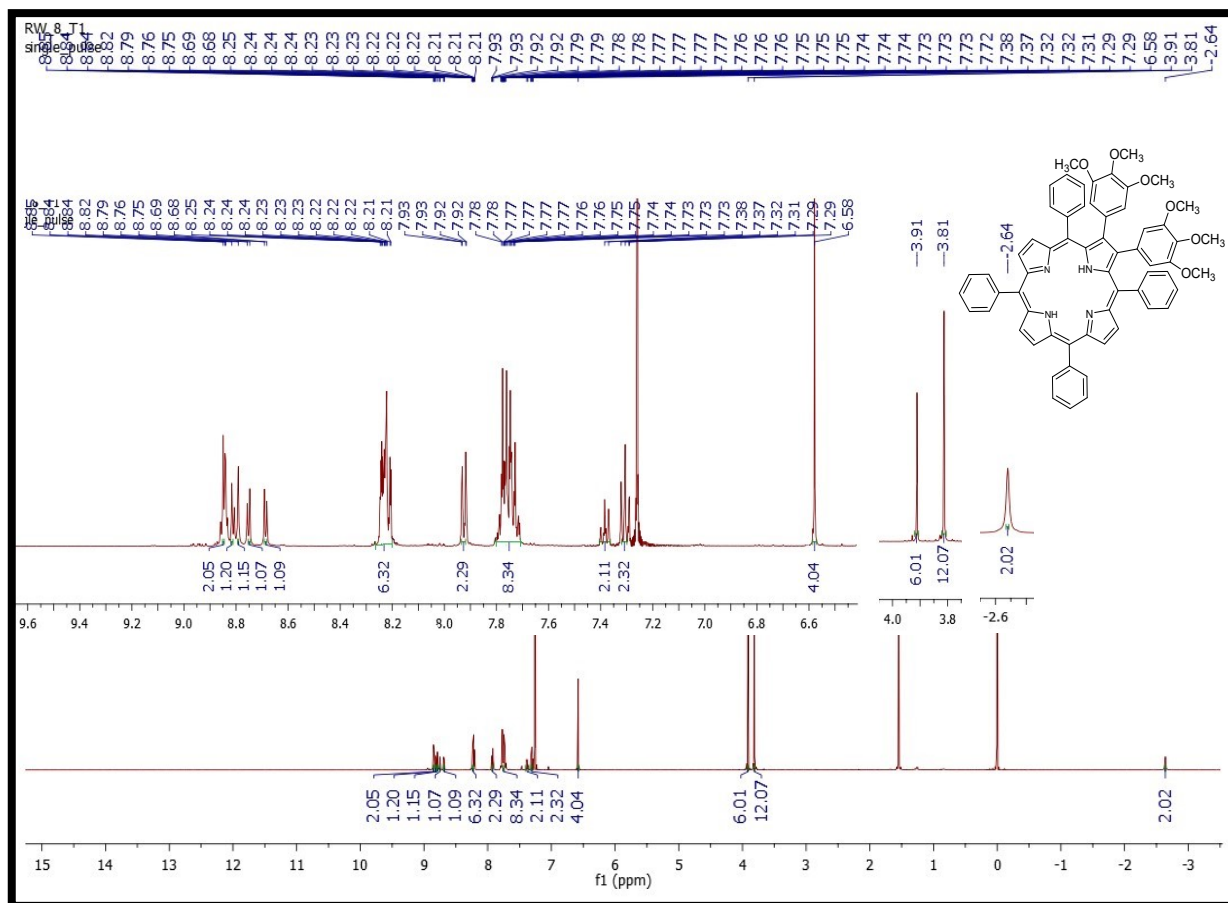

Figure S30. <sup>1</sup>H NMR spectrum of ZnTPP(*m,p*-CH<sub>3</sub>O-Ph)<sub>2</sub> in CDCl<sub>3</sub> at 298 K.

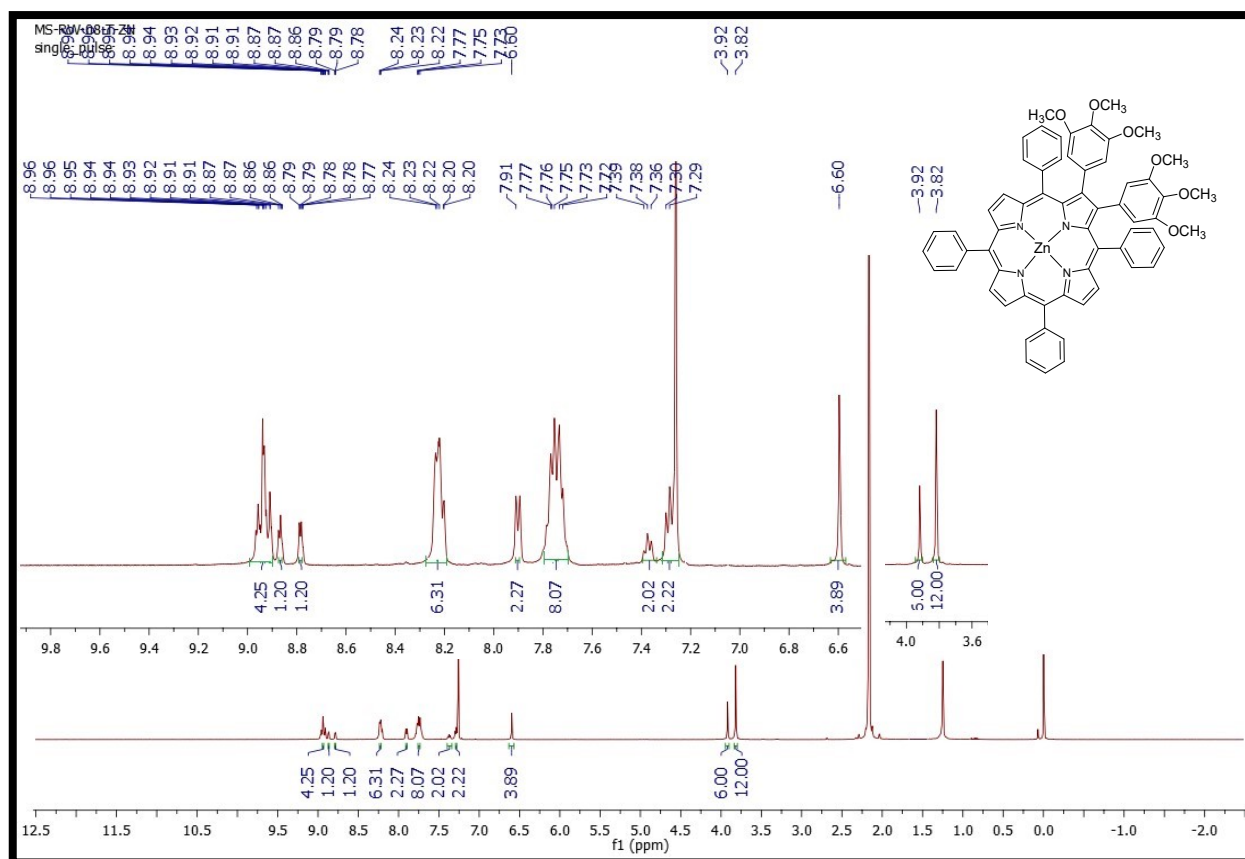

**Figure S31.**  $^1\text{H}$  NMR spectrum of  $\text{NiTPP}(m,p\text{-CH}_3\text{O-Ph})_2$  in  $\text{CDCl}_3$  at 298 K.

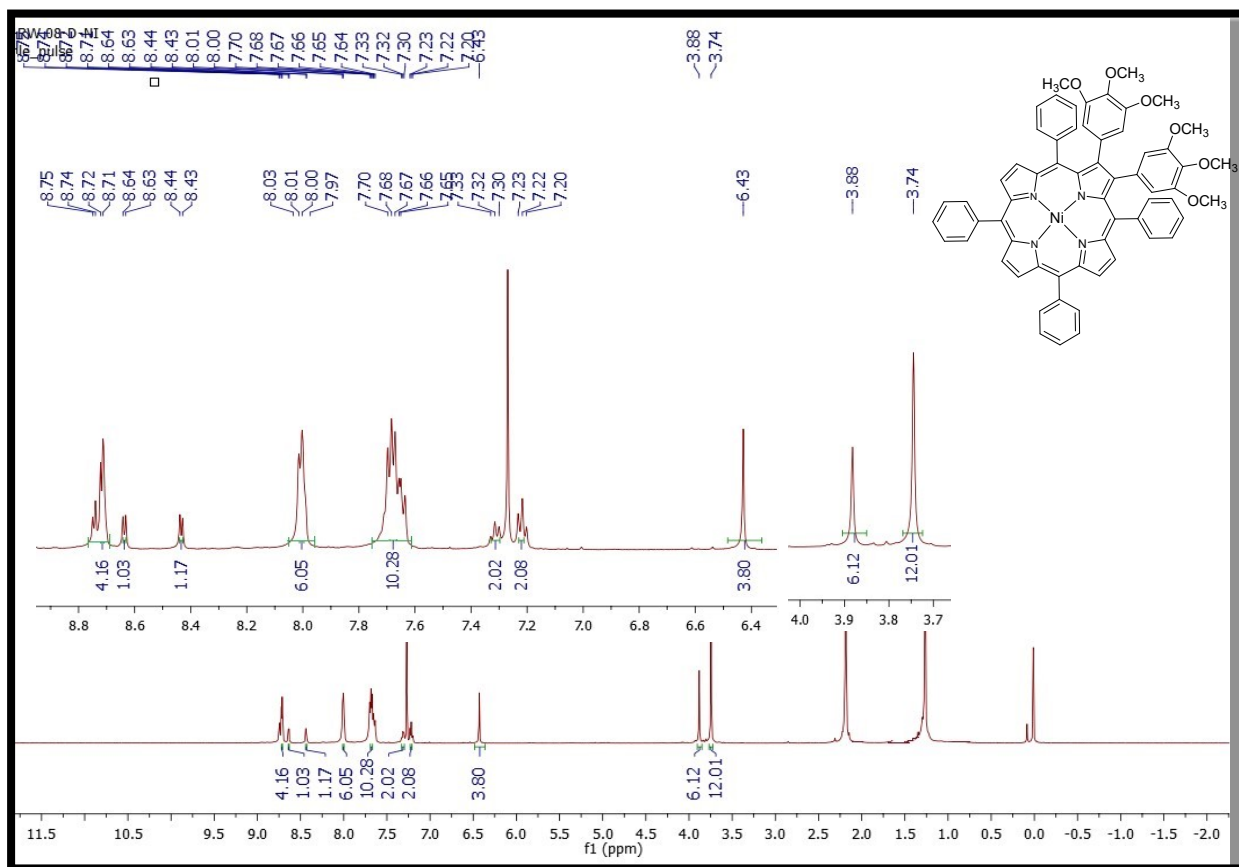

**Figure S32.**  $^{13}\text{C}$  NMR spectrum of  $\text{H}_2\text{TPP}(p\text{-CH}_3\text{O-Ph})_2$  in  $\text{CDCl}_3$  at 298 K.

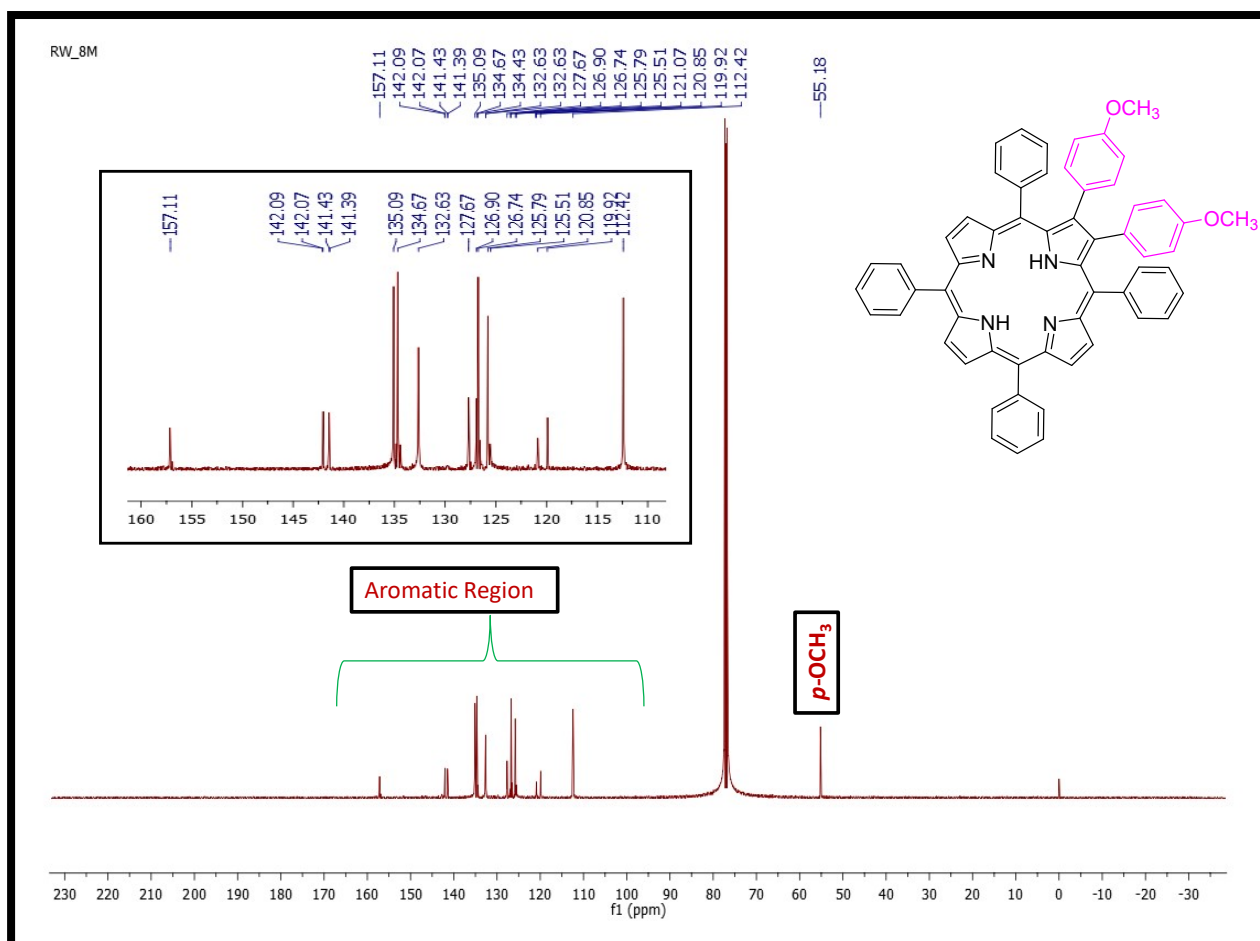

**Figure S33.**  $^{13}\text{C}$  NMR spectrum of  $\text{H}_2\text{TPP}(m\text{-CH}_3\text{O-Ph})_2$  in  $\text{CDCl}_3$  at 298 K.

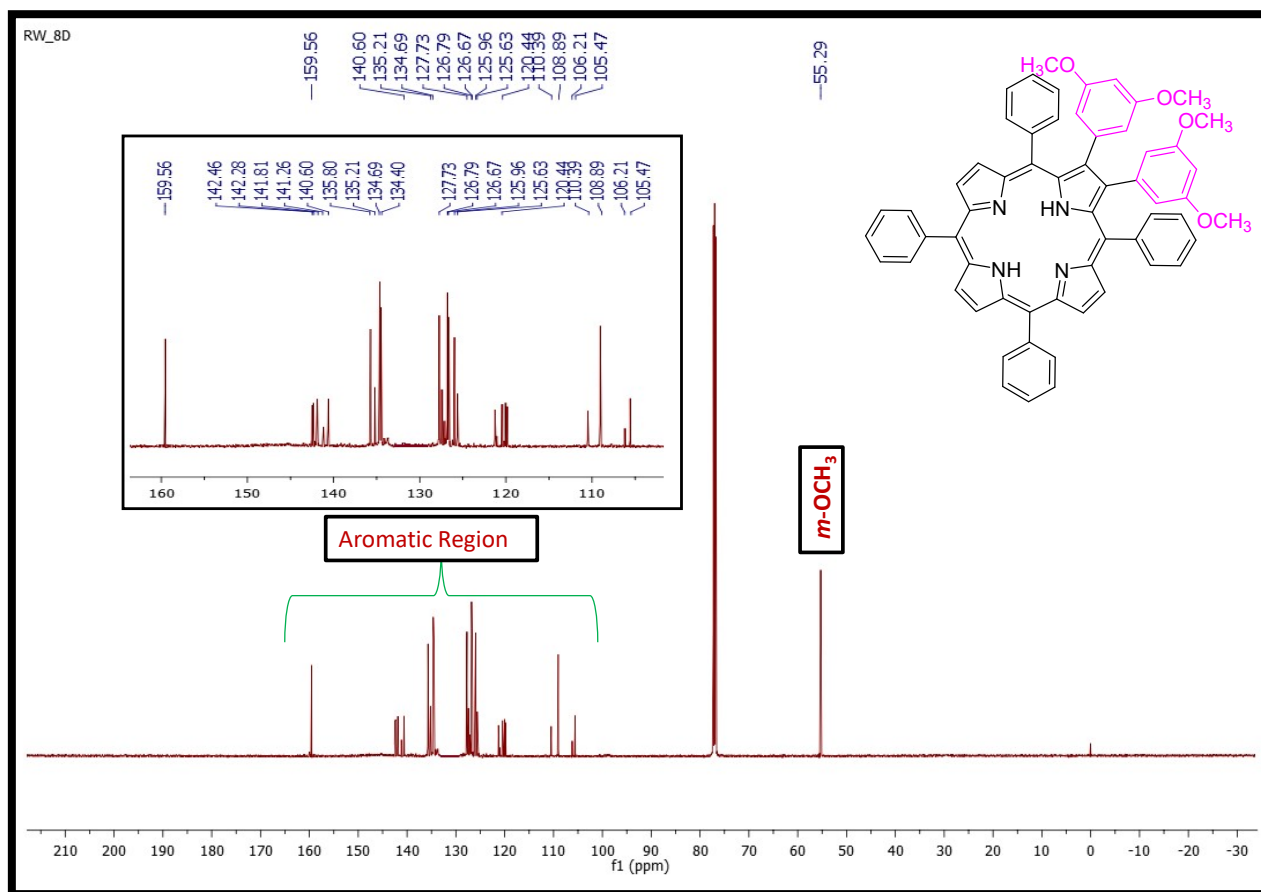

**Figure S34.**  $^{13}\text{C}$  NMR spectrum of  $\text{H}_2\text{TPP}(m,p\text{-CH}_3\text{O-Ph})_2$  in  $\text{CDCl}_3$  at 298 K.

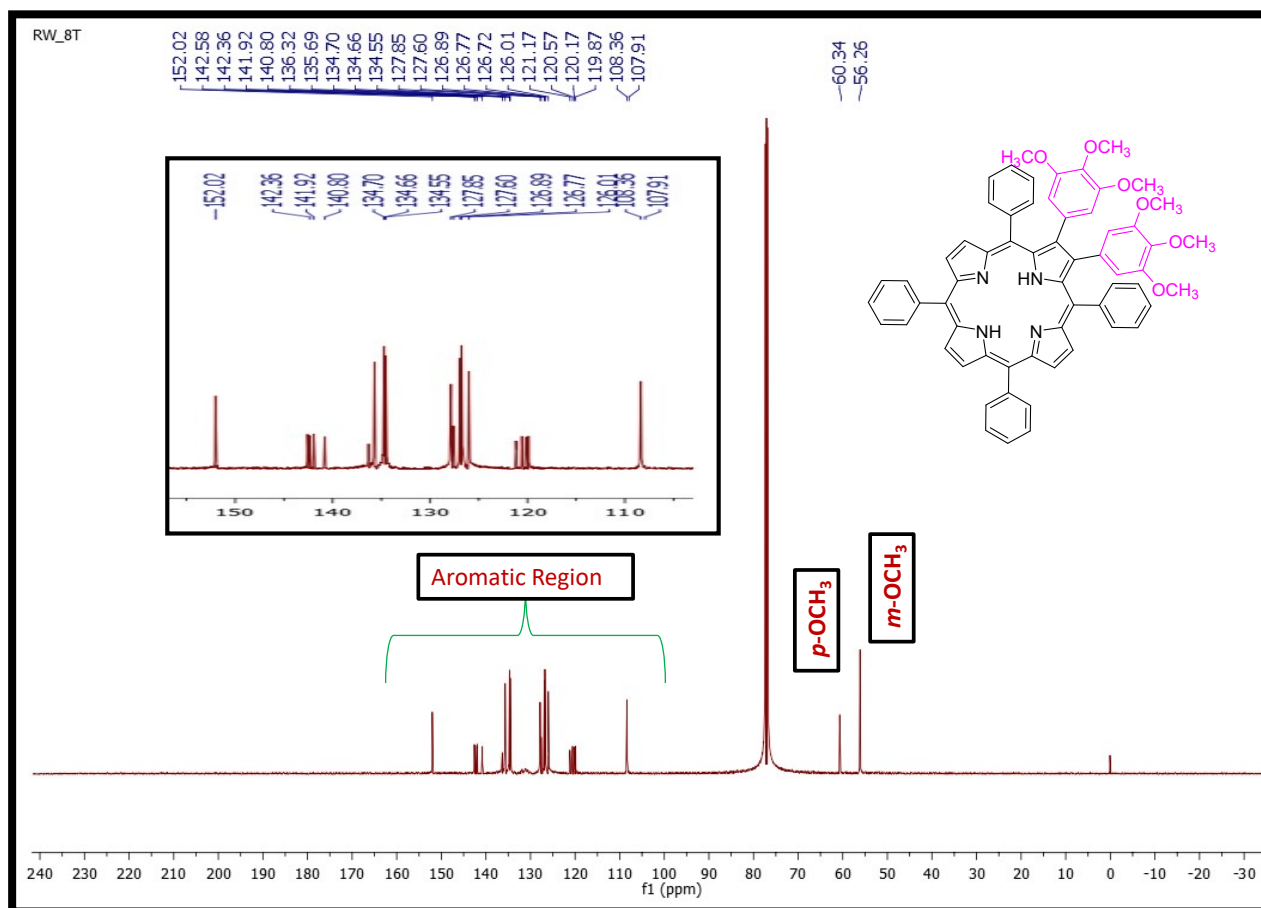

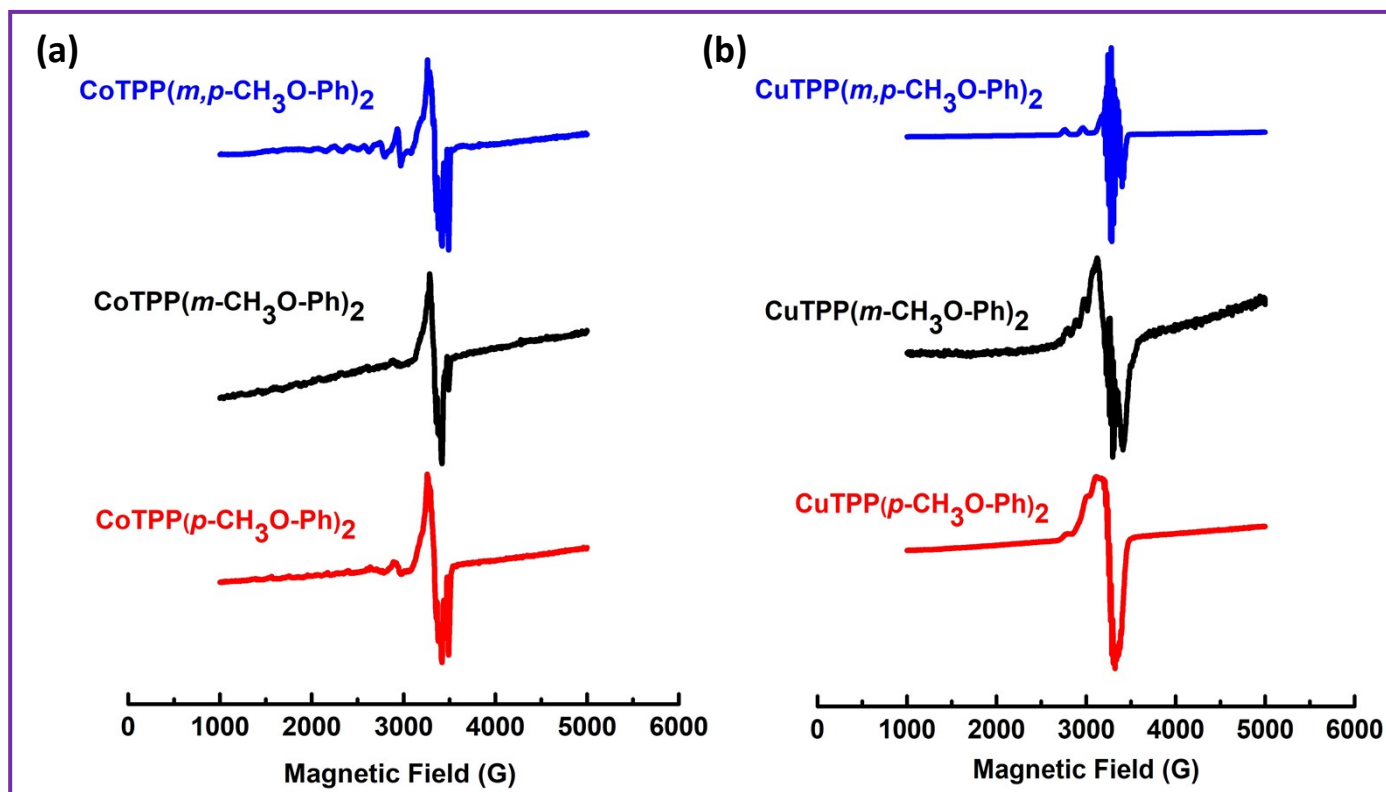

**Figure S35.** X-band EPR Spectra of (a)  $\text{CoTPP}(\text{R})_2$ , where  $\text{R} = p\text{-CH}_3\text{O-Ph}$ ,  $m\text{-CH}_3\text{O-Ph}$  &  $m,p\text{-CH}_3\text{O-Ph}$  (b)  $\text{CuTPP}(\text{R})_2$ ; where  $\text{R} = p\text{-CH}_3\text{O-Ph}$ ,  $m\text{-CH}_3\text{O-Ph}$  &  $m,p\text{-CH}_3\text{O-Ph}$  in toluene at 100 K, with EPR parameters: microwave frequency 9.41 GHz, incident microwave power 1.7 mW, modulation frequency 100 kHz.

**Figure S36.** HRMS spectrum of  $\text{H}_2\text{TPP}(p\text{-CH}_3\text{O-Ph})_2$ .

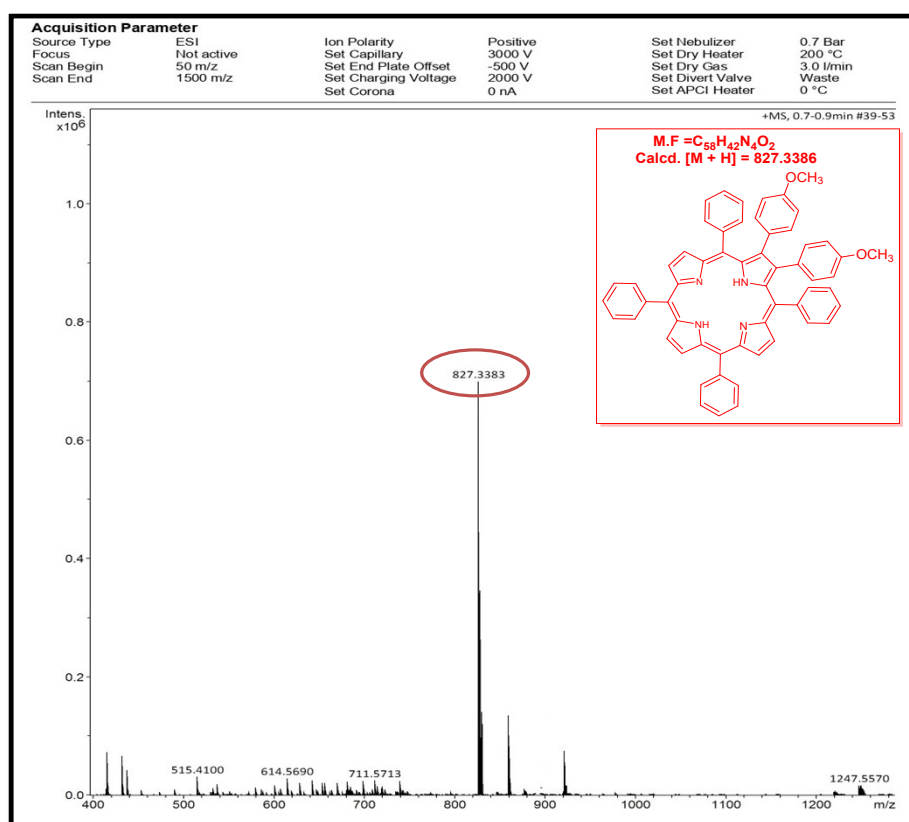

Figure S37. HRMS spectrum of ZnTPP(*p*-CH<sub>3</sub>O-Ph)<sub>2</sub>.

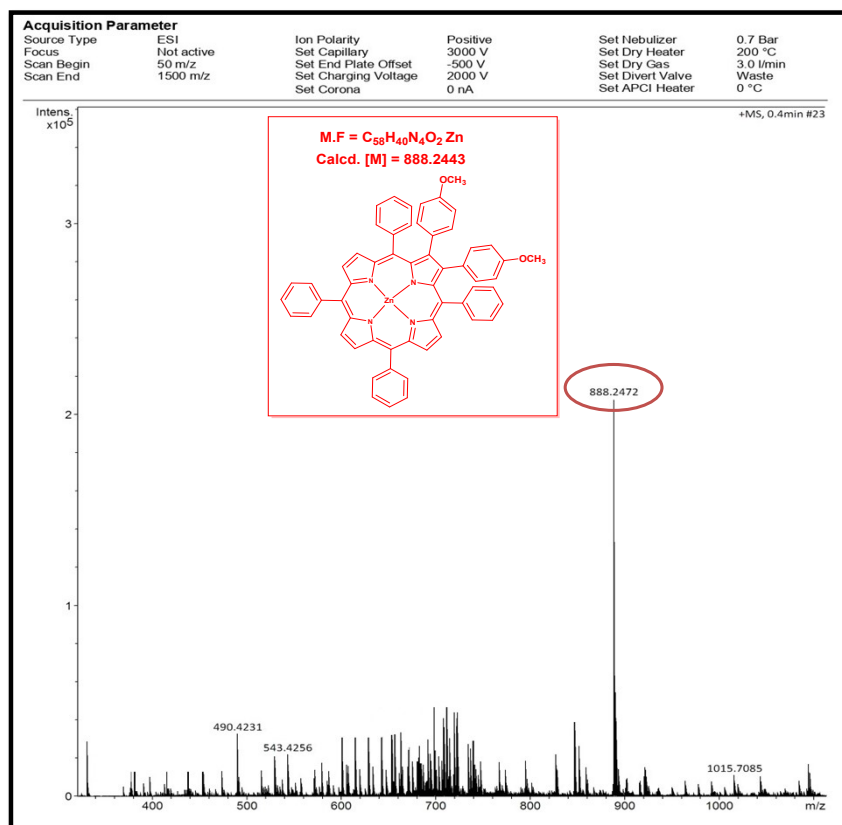

Figure S38. HRMS spectrum of NiTPP(*p*-CH<sub>3</sub>O-Ph)<sub>2</sub>.

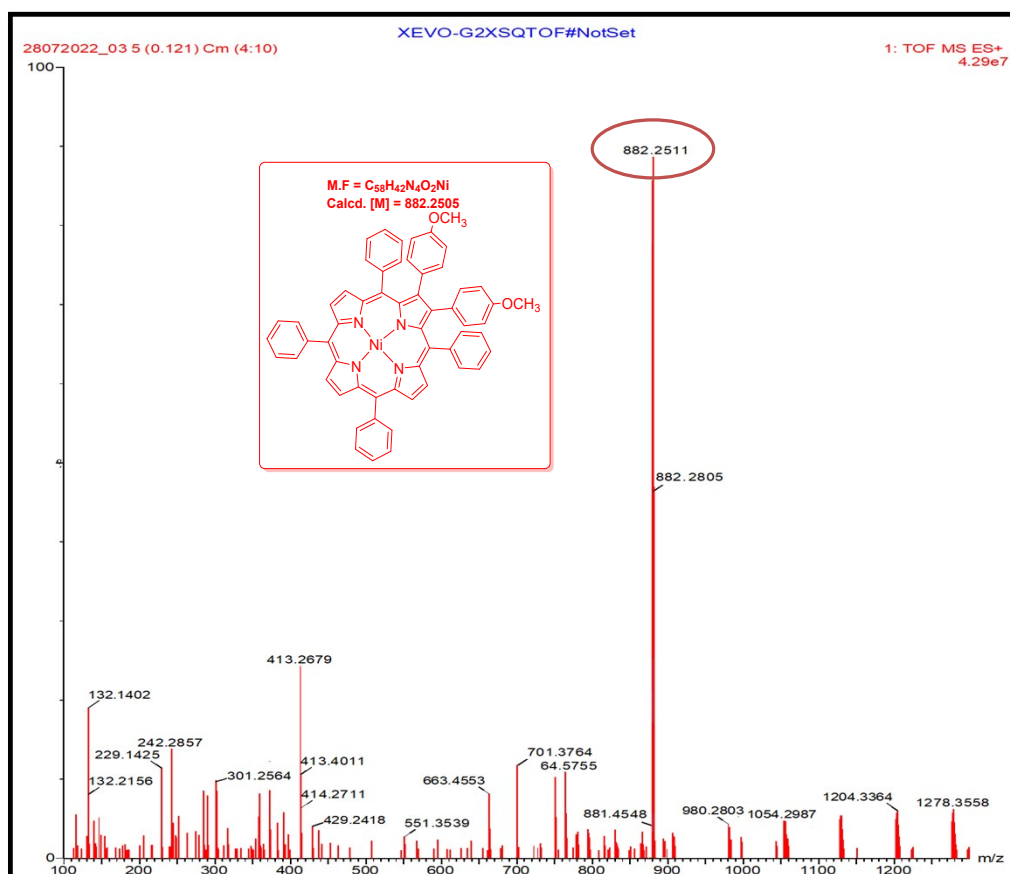

Figure S39. HRMS spectrum of CuTPP(*p*-CH<sub>3</sub>O-Ph)<sub>2</sub>.

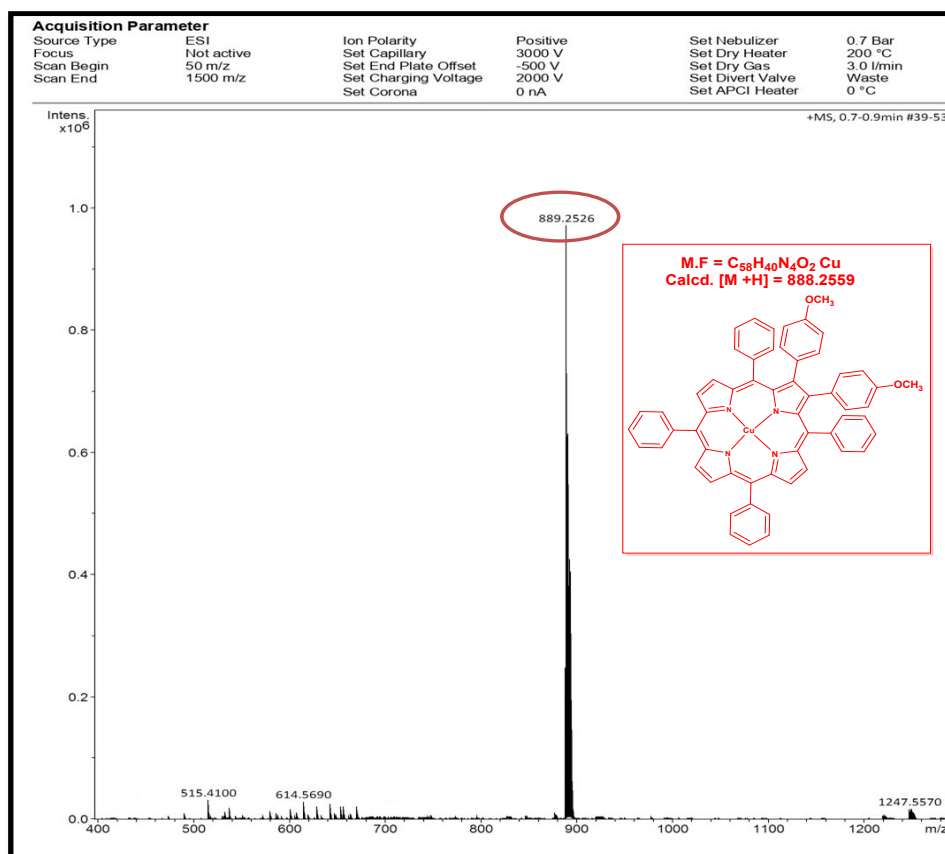

Figure S40. HRMS spectrum of CoTPP(*p*-CH<sub>3</sub>O-Ph)<sub>2</sub>.

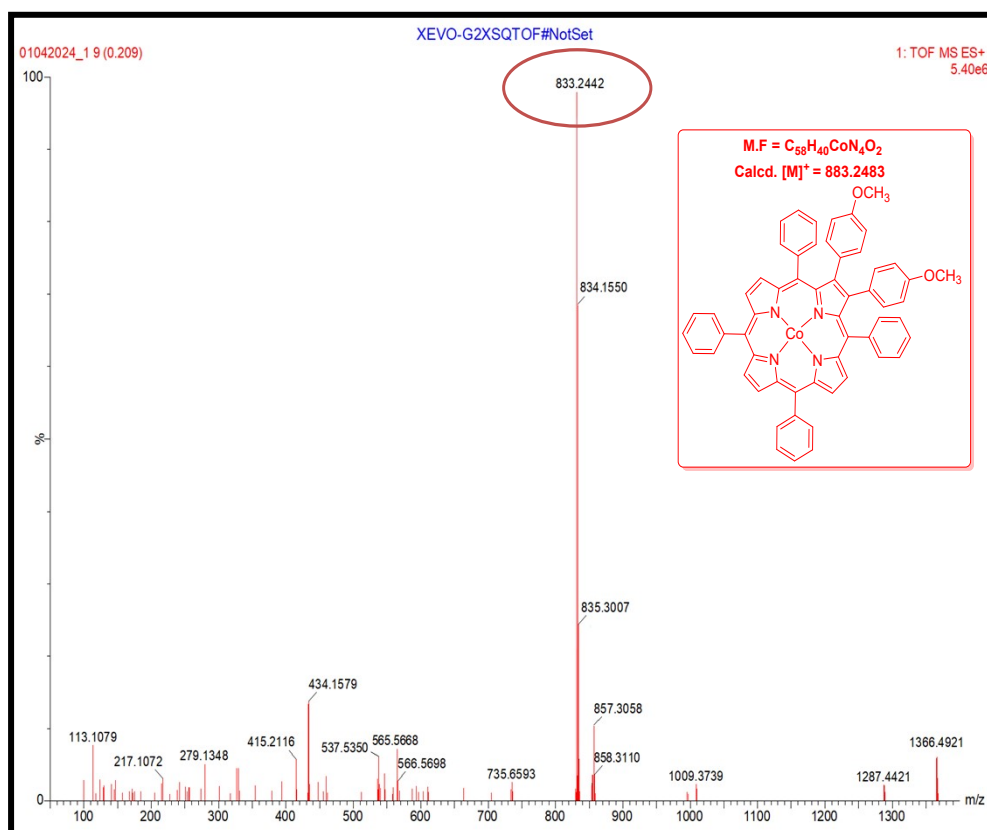



Figure S41. HRMS spectrum of H<sub>2</sub>TPP(*m*-CH<sub>3</sub>O-Ph)<sub>2</sub>.

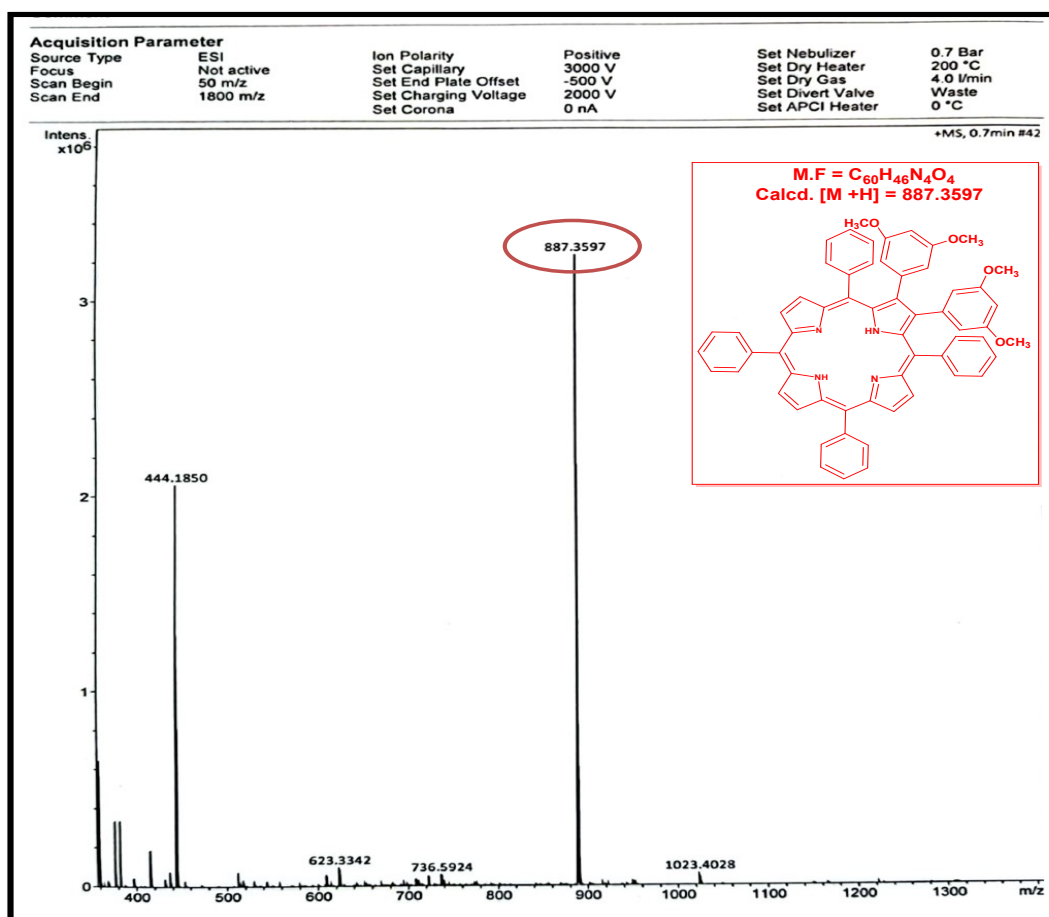

Figure S42. HRMS spectrum of ZnTPP(*m*-CH<sub>3</sub>O-Ph)<sub>2</sub>.

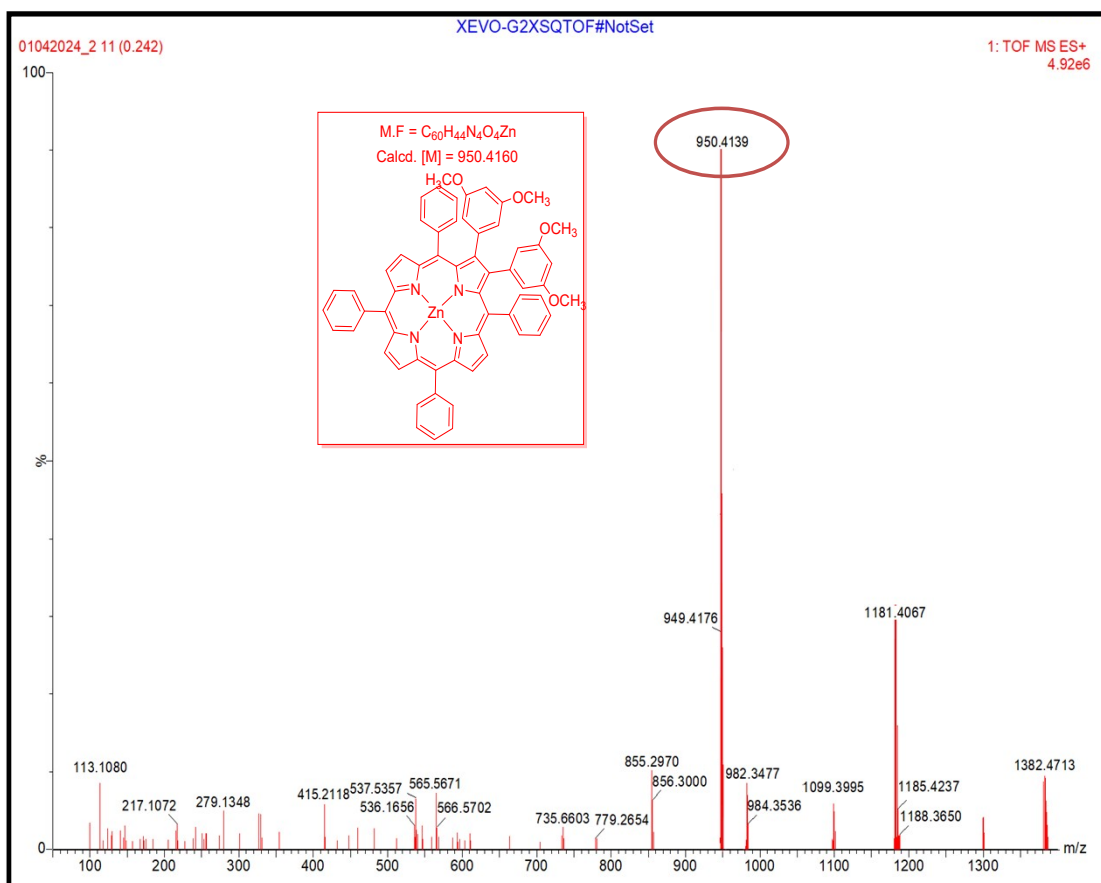

Figure S43. HRMS spectrum of NiTPP(*m*-CH<sub>3</sub>O-Ph)<sub>2</sub>.

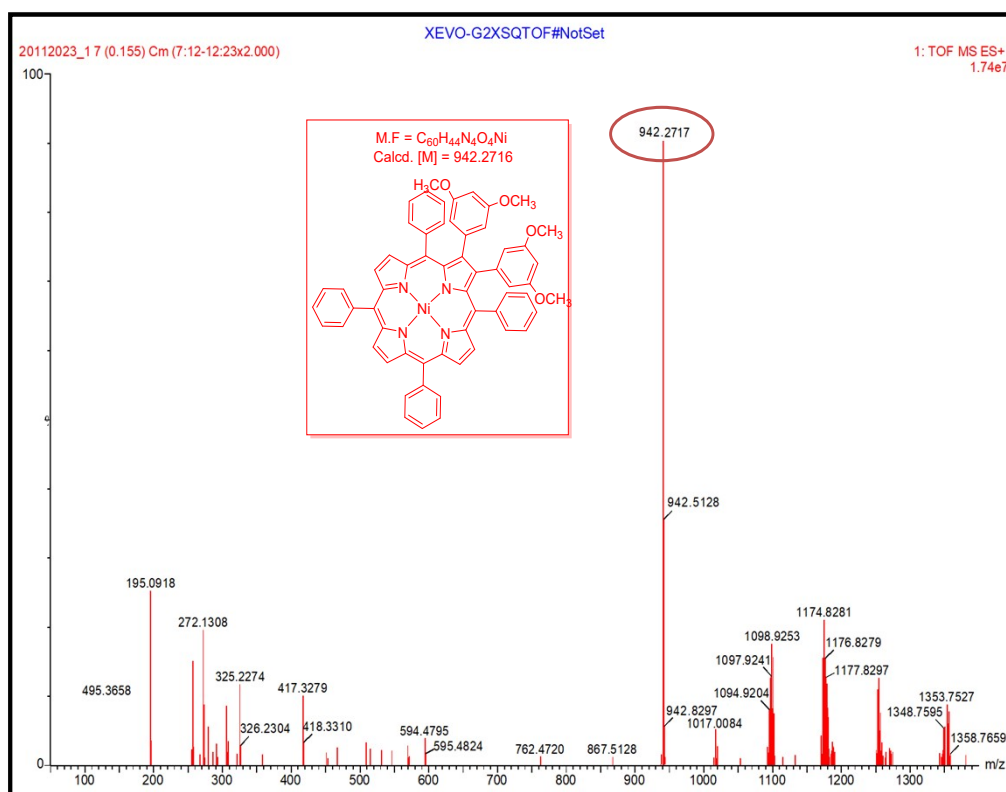

Figure S44. HRMS spectrum of CuTPP(*m*-CH<sub>3</sub>O-Ph)<sub>2</sub>.

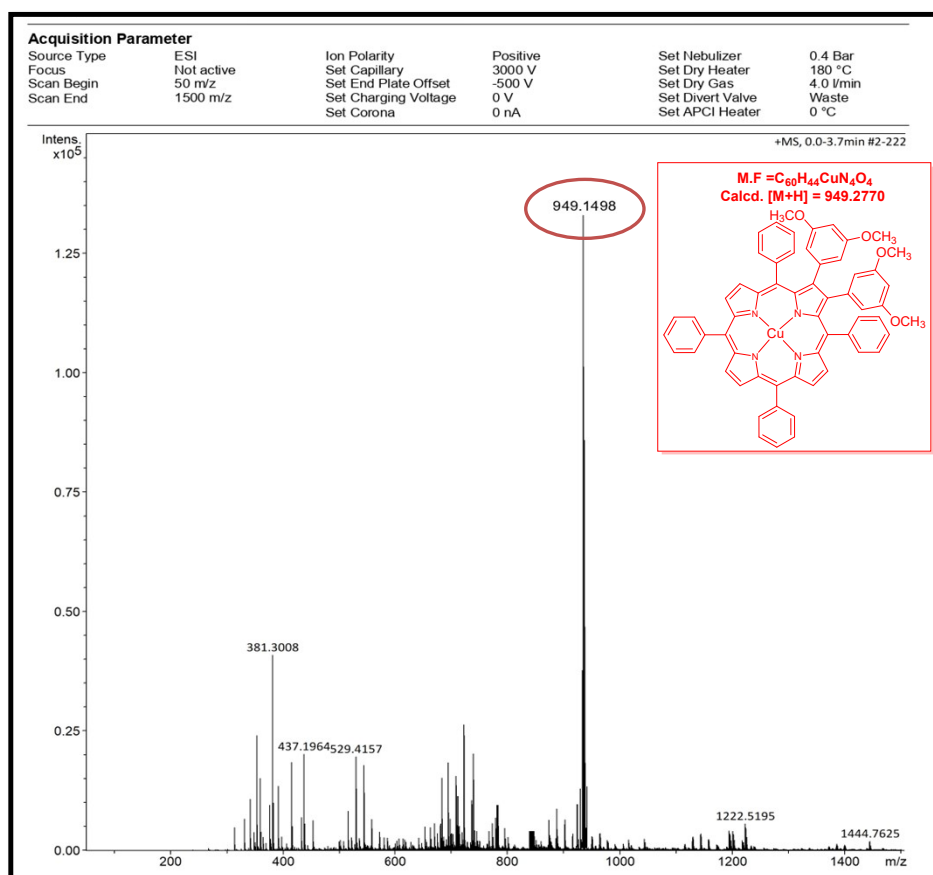

Figure S45. HRMS spectrum of CoTPP(*m*-CH<sub>3</sub>O-Ph)<sub>2</sub>.

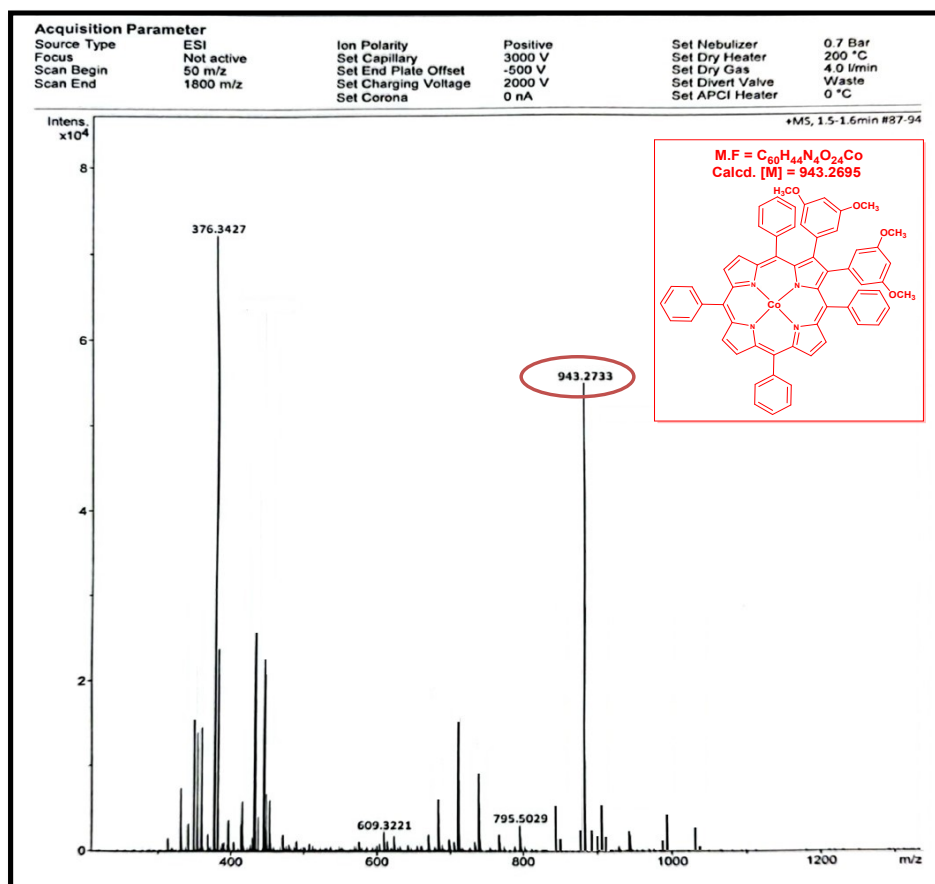

Figure S46. HRMS spectrum of H<sub>2</sub>TPP(*m,p*-CH<sub>3</sub>O-Ph)<sub>2</sub>.

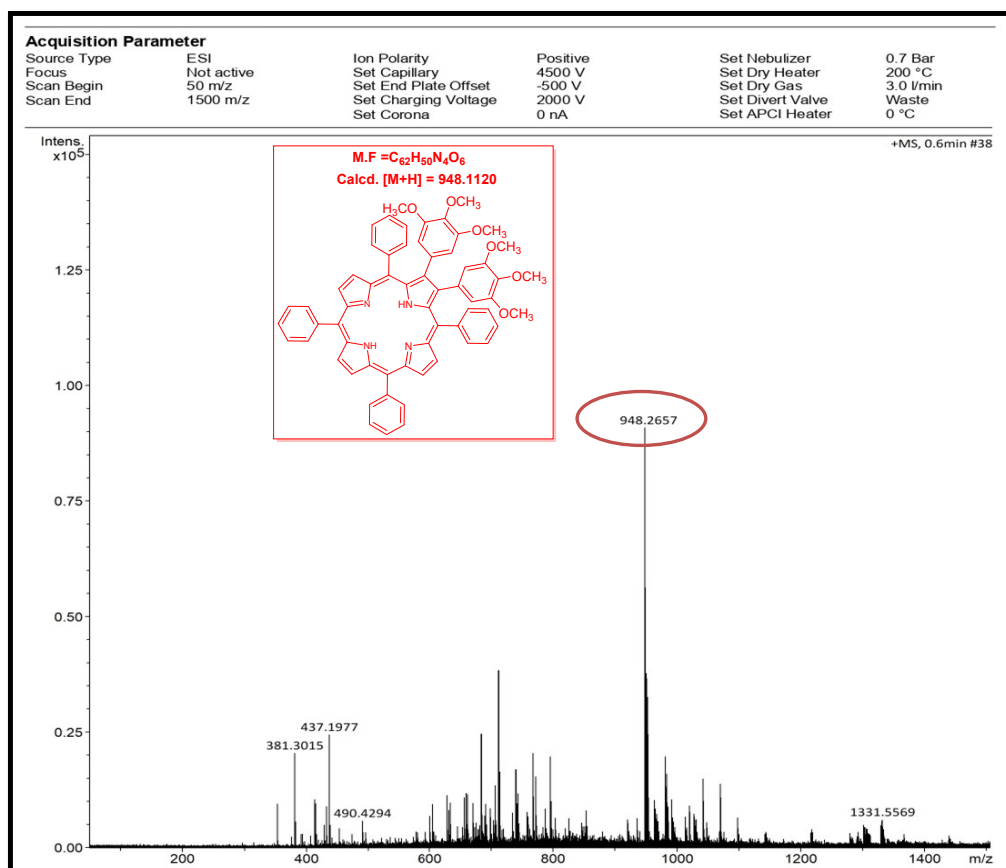

Figure S47. HRMS spectrum of ZnTPP(*m,p*-CH<sub>3</sub>O-Ph)<sub>2</sub>.

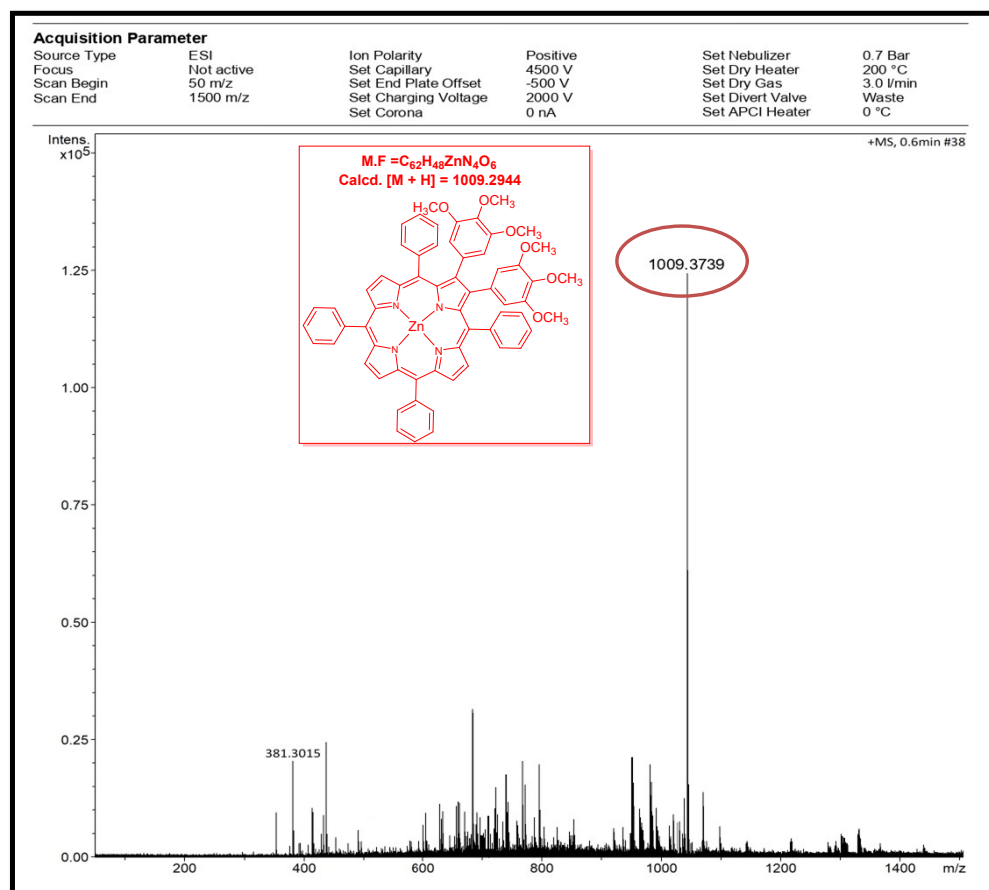

Figure S48. HRMS spectrum of NiTPP(*m,p*-CH<sub>3</sub>O-Ph)<sub>2</sub>.

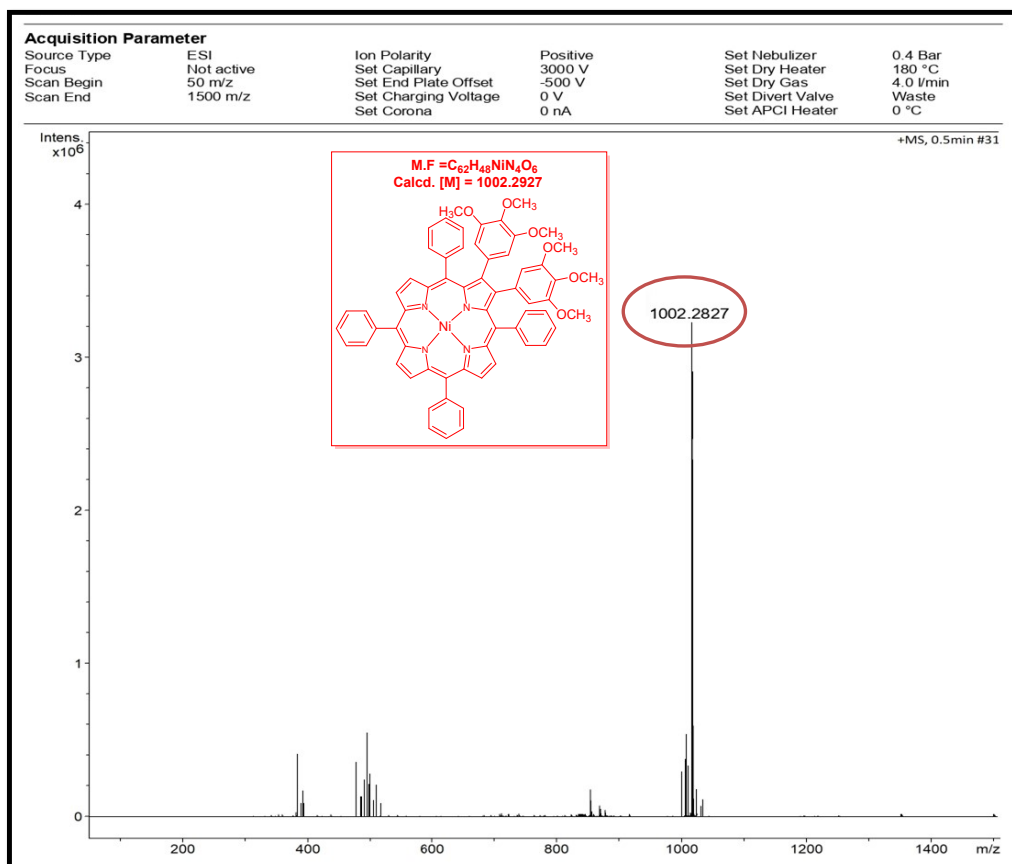

**Figure S49.** HRMS spectrum of  $\text{CoTPP}(m,p\text{-CH}_3\text{O-Ph})_2$ .

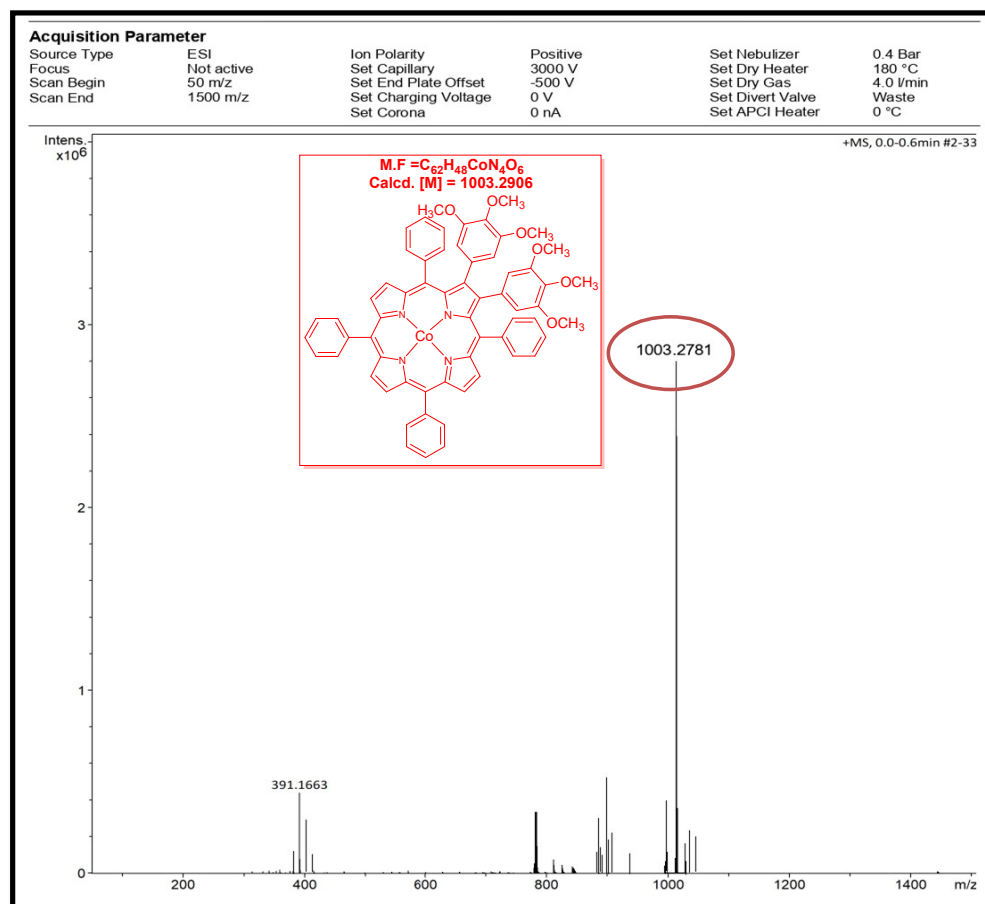

**Figure S50.** HRMS spectrum of  $\text{CuTPP}(m,p\text{-CH}_3\text{O-Ph})_2$ .

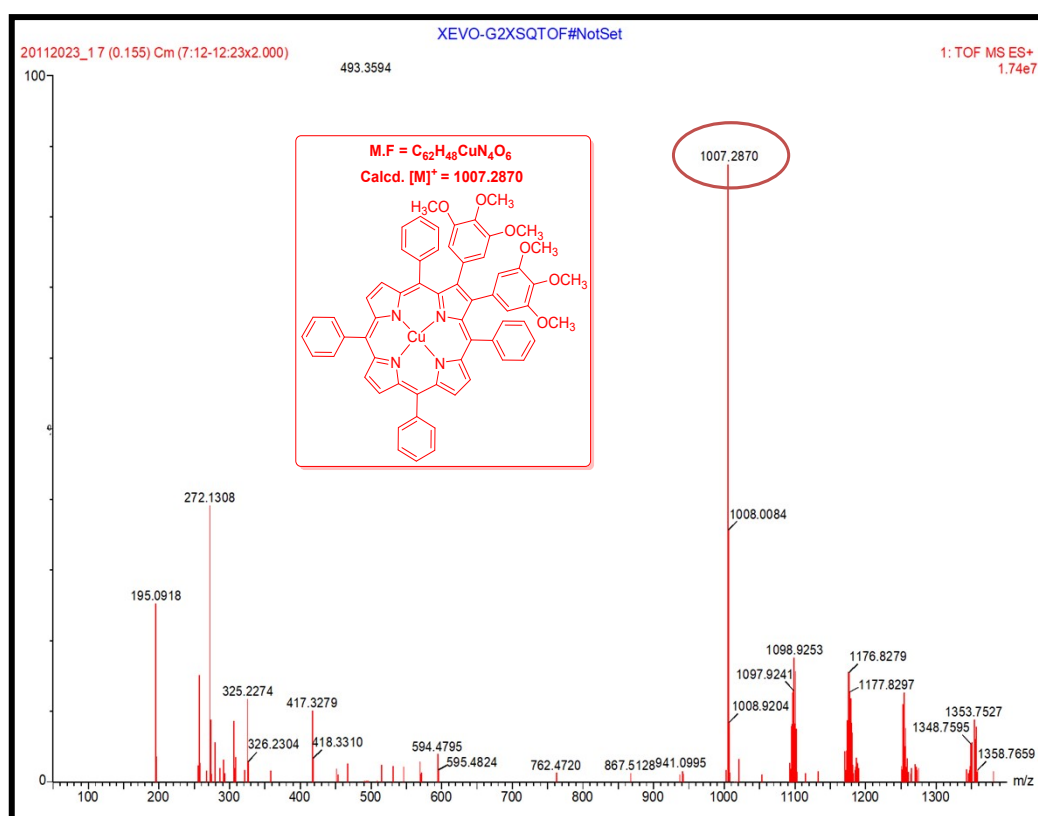

Supplement: d4nj03904a1.pdf [file d4nj03904a1.pdf]
